# Disease Risk Analysis in sea turtles: A baseline study to inform conservation efforts

Narges Mashkour<sup>1\*</sup>, Karina Jones<sup>1,2</sup>, Teresa Valerio Hipolito<sup>1</sup>, Sara Kophamel<sup>1</sup>, Shamim Ahasan<sup>1,3</sup>, Grant Walker<sup>4,5</sup>, Richard Jakob-Hoff<sup>6,7</sup>, Maxine Whittaker<sup>1</sup>, Mark Hamann<sup>8</sup>, Ian Bell<sup>9</sup>, Jennifer Elliman<sup>1</sup>, Leigh Owens<sup>1</sup>, Claire Saladin<sup>10</sup>, Jose Luis Crespo-Picazo<sup>11</sup>, Brett Gardner<sup>12,13</sup>, Aswini Leela Loganathan<sup>14</sup>, Rachel Bowater<sup>1</sup>, Erina Young<sup>15</sup>, Andrew Barnes<sup>16</sup>, David Robinson<sup>17</sup>, Warren Baverstock<sup>17</sup>, David Blyde<sup>18</sup>, Duan March<sup>19,20</sup>, Maryam Eghbali<sup>21</sup>, Maryam Mohammadi<sup>22</sup>, Daniela Freggi<sup>23</sup>, Jane Giliam<sup>24</sup>, Mike Hale<sup>25</sup>, Nicholas Nicolle<sup>13</sup>, Kevin Spiby<sup>13</sup>, Daphne Wrobel<sup>26</sup>, Mariluz Parga<sup>27</sup>, Asghar Mobaraki<sup>28</sup>, Rupika Rajakaruna<sup>29</sup>, Kevin P. Hyland<sup>30</sup>, Mark Read<sup>31</sup>, Ellen Ariel<sup>1</sup>

1. College of Public Health, Medical and Veterinary Sciences James Cook University, Townsville, Australia; 2. College of Medicine and Dentistry, James Cook University, Townsville, Australia; 3. Faculty of Veterinary And Animal Science, Hajee Mohammad Danesh Science & Technology University, Dinjapur 5200, Rangpur, Bangladesh; 4. North East Sea Turtles, Charlotteville, Tobago, Trinidad and Tobago; 5. Institute of Biodiversity Animal Health and Comparative Medicine, University of Glasgow, Scotland; 6. New Zealand Centre for Conservation Medicine, Auckland Zoo; 7. School of Veterinary and Biomedical Sciences, Murdoch University; 8. College of Science and Engineering, James Cook University, Townsville, Australia; 9. Faculty of Health and Behavioural Sciences, University of Queensland. Brisbane, Qld 4072, Australia; 10. Reserve Naturelle de Saint Barthelemy, Gustavia, 97133 Saint Barthelemy FWI/Reserve Naturelle de Saint Martin, Hope Estate, 97150 Saint Martin, French West Indies; 11. Fundación Oceanogràfic, Veterinary Services & Research Department, Avanqua Oceanogràfic-Àgora, Valencia, Spain; 12. Australia Zoo Wildlife Hospital, Beerwah, Queensland, Australia; 13. Two Oceans Aquarium, Cape Town, South Africa; 14. Biotechnology Research Institute, Universiti Malaysia, Sabah, Malaysia; 15. Conservation Medicine Program School of Veterinary and Life Sciences, College of Veterinary Medicine Murdoch University, Western Australia; 16. Aquatic Animal Health, School of Biological Sciences and Centre for Marine Science, University of Queensland, Brisbane, Australia; 17. The Aquarium & Dubai Turtle Rehabilitation Project, Burj Al Arab, Dubai, United Arab Emirates; 18. Sea World, Gold Coast, Queensland, Australia; 19. National Marine Science Centre & Centre for Coastal Biogeochemistry Research, School of Environment, Science and Engineering, Southern Cross University, Coffs Harbour, NSW, Australia; 20. Dolphin Marine Rescue Animal Rehab Trust, Coffs Harbour, New South Wales, Australia; 21. Ideh no doostdar\_E- Hormozgan Ecotourism and NGO group; 22. Department of Environment, Kish, Iran; 23. Sea Turtle Rescue Centre, Lampedusa, Italy; 24. The Ark Animal Hospital, northern territory, Australia; 25. Yuku Baja Muliku Ranger Base, Archer Point, Australia; 26. Fundação Pró-TAMAR, Rua Professor Ademir Francisco s/n – Barra da Lagoa, Florianópolis – SC, 88061-160 Brazil; 27. SUBMON - Marine Environmental Services, Spain; 28. Department of the Environment, Wildlife and Aquatic Affairs Bureau, Tehran, Iran; 29. University of Peradeniya, Peradeniya, Sri Lanka; 30. Wildlife Protection Office, Dubai, United Arab Emirates; 31. Field Management Unit, Great Barrier Reef Marine Park Authority, Queensland, Australia;

\*Corresponding Author

43

44

45

46

47

## Abstract

48

The impact of a range of different threats has resulted in the listing of six out of seven sea turtle 49  
species on the IUCN Red List of endangered species. Disease risk analysis (DRA) tools are designed to 50  
provide objective, repeatable and documented assessment of the disease risks for a population and 51  
measures to reduce these risks through management options. To the best of our knowledge, DRAs 52  
have not previously been published for sea turtles, although disease is reported to contribute to sea 53  
turtle population decline. Here, a comprehensive list of health hazards is provided for all seven 54  
species of sea turtles. The possible risk these hazards pose to the health of sea turtles were assessed 55  
and “One Health” aspects of interacting with sea turtles were also investigated. The risk assessment 56  
was undertaken in collaboration with more than 30 experts in the field including veterinarians, 57  
microbiologists, social scientists, epidemiologists and stakeholders, in the form of two international 58  
workshops and one local workshop. The general finding of the DRA was the distinct lack of 59  
knowledge regarding a link between the presence of pathogens and diseases manifestation in sea 60  
turtles. A higher rate of disease in immunocompromised individuals was repeatedly reported and a 61  
possible link between immunosuppression and environmental contaminants as a result of 62  
anthropogenic influences was suggested. Society based conservation initiatives and as a result the 63  
cultural and social aspect of interacting with sea turtles appeared to need more attention and 64  
research. A risk management workshop was carried out to acquire the insights of local policy makers 65  
about management options for the risks relevant to Queensland and the options were evaluated 66  
considering their feasibility and effectiveness. The sea turtle DRA presented here, is a structured 67  
guide for future risk assessments to be used in specific scenarios such as translocation and head- 68  
starting programs. 69

70

71

72

73

# 1. Introduction

74

The International Union for Conservation of Nature (IUCN) has listed six of the seven sea turtle species on the IUCN Red List of endangered species while the seventh species, the flatback turtle (*Natator depressus*), is reported as “Data Deficient” (1). Over the past 100 years, the world population of sea turtles has declined due to direct and indirect human interventions (2). Disease is likely a contributing or primary factor in sea turtle deaths and poses challenges to conservation programs (3), but due to a number of factors, including the challenges of sampling wild marine animals in remote areas, incidences are generally under-reported (4).

It is particularly difficult to capture a sea turtle with clinical signs in the wild as sea turtles are often hard to locate and difficult to access in remote areas (5). Postmortem examination provides the most robust opportunity to identify diseases and their aetiology. Unfortunately, the difficulty of retrieving carcasses in the wild, as well as postmortem changes, can complicate the process of making a reliable diagnosis (6). In addition, the results of such studies would not aid in determining the rate of morbidity versus mortality. An alternative way to investigate wildlife disease is to conduct controlled experimental studies, but due to their endangered status, such studies are difficult to justify for sea turtles (7).

Scientists have validated the methods used for health assessment of other animals in sea turtles (3) and applied these procedures for sea turtle health and rehabilitation (8). Despite this, it is still challenging in some instances to diagnose the cause of disease or death in sea turtles (9) and prevention and control measures are therefore not fully achievable (10).

The limitations and uncertainties of wildlife disease assessment call for structured, evidence-based approaches to inform management and reduce the risk of diseases, where disease drivers and their contribution to other threats can be defined. Wildlife Disease Risk Analysis (DRA) is most effective when taking a multidisciplinary approach involving scientists, clinicians and relevant decision makers to develop rational, effective and unbiased conclusions for wildlife health surveillance in support of conservation strategies.

The latest DRA manual was published by the World Organisation for Animal Health (OIE) and IUCN Species Survival Commission in 2014. The manual addresses different scenarios for endangered species and translocating them for conservation purposes and enables the pros and cons of these actions to be thoroughly investigated (11). In order to accommodate the unique biology of sea turtles, the DRA process as described in this manual requires certain modifications to realistically articulate with situations such as translocating animals or investigating the risks of disease for a population in its normal habitat. A 2015 study describes a systematic approach to investigate

disease-related population decline without confining the assessment to a particular scenario or 107  
location (6). This method is a modified version of a DRA based on epidemiological principles (6) for 108  
any declining wildlife population. A successful DRA considers the study population in the context of 109  
the environment. 110

In the 1960's, Calvin Schwabe coined the term "*One Medicine*" which then extended to "*One Health*" 111  
that takes into account the inter-dependent health of humans, livestock and wildlife (12, 13). One 112  
Health is an all-inclusive collaboration between public health, animal health and environmental 113  
specialists as well as communities and social scientists, through a transdisciplinary approach, to 114  
sustain the world's health (14). The founding belief behind promoting One Health is the 115  
interconnected health of humans, animals and the environment. Approximately 75% of human 116  
infectious diseases are zoonotic, or in other words, are caused by multi-host pathogens carried by 117  
animals (12). Unsustainable degradation of the environment by humans, toxins and chemical 118  
contaminants are also known to enhance the rate of emerging diseases in people, wildlife and 119  
livestock (15, 16). Humans are also contributing to pressure on wildlife by the increasing demands 120  
for meat protein and subsequent habitat degradation (12). 121

Disease affects not only a population, but also the habitat, the other animals and humans that share 122  
it and *vice versa*. In the context of One Health, green turtles (*Chelonia mydas*) are particularly 123  
important due to their longevity and fidelity to a near-shore foraging site (17, 18). Their continuous 124  
and long-term residency in a given location makes them good sentinels for local environmental 125  
health (19) and thereby function as marine 'ambassadors' for One Health. 126

There are currently no published reports on DRA for sea turtles and this gap compromises strategies 127  
presently implemented to address sea turtle conservation action such as disease control, clutch 128  
translocations and hatchery establishment. In this study, both DRA models described by Jakob-Hoff 129  
*et al.* (11) and Pacioni *et al.* (6) were integrated to highlight how these guidelines can be used to 130  
develop a DRA for sea turtles. The purpose of this study is to provide a baseline DRA which should 131  
serve as an example of this process for future, case-specific studies aiming to inform management 132  
decisions. The interrelated health of sea turtles, marine and terrestrial animals, humans and the 133  
environment were also addressed to define One Health factors. 134

## 2. Methods

135

The process of a DRA is outlined in Figure 1. Briefly, DRA organisers define a specific scenario for a wildlife population, for example translocating a clutch of sea turtle eggs from A to B (Step 1. Problem description). Then, published literature and unpublished reports about the hazards are collected and a group of experts are invited to review the information. This collection of comprehensive knowledge enables identification of hazards to the population under consideration (Step 2. Hazard identification). Assessing the knowledge of likelihood and consequences for each hazard, ideally conducted as a workshop with invited experts, will help to prioritise the need for research or surveillance strategies (Step 3. Risk assessment). Following a structured risk assessment, the prioritised health hazards or risks will be presented to a group of stakeholders who will review management options and the use of these options based on an assessment of their feasibility and effectiveness (Step 4. Risk management). The final step (Step 5. Implementation and review) is focused on finding the possible errors in executing the solutions suggested in the process (11).

148

*Fig 1 Steps in the disease risk analysis process, reproduced from the DRA manual published by OIE and IUCN (2014)*

149

|                                                                                                                                                                                                                                                                                                                                                                                                                                                                                                                                                                                                                                                                                                                                                                                                                                                                                                                                                                                                                                                                                                                                                                                                                         |                                                                                  |
|-------------------------------------------------------------------------------------------------------------------------------------------------------------------------------------------------------------------------------------------------------------------------------------------------------------------------------------------------------------------------------------------------------------------------------------------------------------------------------------------------------------------------------------------------------------------------------------------------------------------------------------------------------------------------------------------------------------------------------------------------------------------------------------------------------------------------------------------------------------------------------------------------------------------------------------------------------------------------------------------------------------------------------------------------------------------------------------------------------------------------------------------------------------------------------------------------------------------------|----------------------------------------------------------------------------------|
|                                                                                                                                                                                                                                                                                                                                                                                                                                                                                                                                                                                                                                                                                                                                                                                                                                                                                                                                                                                                                                                                                                                                                                                                                         | 150                                                                              |
| <b>2.1. Problem description</b>                                                                                                                                                                                                                                                                                                                                                                                                                                                                                                                                                                                                                                                                                                                                                                                                                                                                                                                                                                                                                                                                                                                                                                                         | 151                                                                              |
| The larger the spatial scale of the area of interest, the harder it is to describe the risks and apply management. For this reason, “Management units” need to be defined alongside the problem description. The DRA must focus on localised scenarios such as translocating a clutch of eggs from A to B, establishing a turtle hatchery in location X or the outbreak of a bacterial or parasitic infectious disease in a rookery. However, as this DRA is a guideline for future researchers and managers to facilitate realistic risk management, defining a problem description for the present study involving the global population of sea turtles would be erroneous. Although, the population decline of sea turtles and the difficulties in disease diagnosis suggest that the problem can be described as: “Certain infectious or non-infectious diseases are likely to contribute to sea turtle population decline” this is not specific enough to make the risk management achievable. To capture all of the expertise in this field, we have refrained from defining a problem description. However, in the interest of this guide, one example with specific problem description is given in Appendix 1. | 152<br>153<br>154<br>155<br>156<br>157<br>158<br>159<br>160<br>161<br>162<br>163 |
| <b>2.2. Hazard Identification</b>                                                                                                                                                                                                                                                                                                                                                                                                                                                                                                                                                                                                                                                                                                                                                                                                                                                                                                                                                                                                                                                                                                                                                                                       | 164                                                                              |
| A “hazard” is defined as any agent that can harm or damage the receiver and becomes a “risk” when the receiver is exposed to that hazard. We have compiled a comprehensive list of hazards to sea turtle health, which are not necessarily considered a risk for the species, but provide an exhaustive review of the published literature for future reference. Unpublished data was accessed through inter-discipline collaborators based around the world e.g. veterinarians and researchers from rehabilitation centres and universities (Figure 2).                                                                                                                                                                                                                                                                                                                                                                                                                                                                                                                                                                                                                                                                | 165<br>166<br>167<br>168<br>169<br>170<br>171                                    |
| <i>Fig 2 Origin of contributors to the hazard identification and assessment of sea turtle diseases.</i>                                                                                                                                                                                                                                                                                                                                                                                                                                                                                                                                                                                                                                                                                                                                                                                                                                                                                                                                                                                                                                                                                                                 | 172<br>173                                                                       |
| For clarification, the disease hazards are divided into infectious and non-infectious and each of those further sub-divided to facilitate the risk assessment of each disease hazards.                                                                                                                                                                                                                                                                                                                                                                                                                                                                                                                                                                                                                                                                                                                                                                                                                                                                                                                                                                                                                                  | 174<br>175                                                                       |
| <b>2. 2.1. Infectious Hazards</b>                                                                                                                                                                                                                                                                                                                                                                                                                                                                                                                                                                                                                                                                                                                                                                                                                                                                                                                                                                                                                                                                                                                                                                                       | 176                                                                              |
| Infectious disease is among the top five reasons for terrestrial species extinction (20). At present, the status of marine animals has not been assessed which highlights the need for further studies on infectious diseases in marine wildlife. In addition to directly threatening the biodiversity of free-living animals, wildlife diseases can also pose a threat to domestic animals and humans if wildlife act as a reservoir for pathogens (21).                                                                                                                                                                                                                                                                                                                                                                                                                                                                                                                                                                                                                                                                                                                                                               | 177<br>178<br>179<br>180<br>181                                                  |

The infectious hazards for sea turtles were categorised into four groups: bacteria, fungi, parasites and viruses. In each category, pathogens were listed alphabetically with available information summarised. Table 1 is an example of this information for a bacterial pathogen. As sea turtles are migratory species and inhabit different marine environments at different life stages (22), the geographical distribution of pathogens and host age were included, if known. Likewise, the presence of these pathogens in the wild and in captive populations were specified. The known infected or potential hosts were registered for each pathogen including related species, in order to address One Health considerations. Where possible, the correlation with climatic influence and/or anthropogenic events were also included to assess possible correlation.

Table 1 Example of an infectious bacterial health hazard summary for “*Lactococcus garviae*”.

| Infectious health hazard   | Region reported | Presence in sea turtle |                                                                        | Outcome of infection*                                        | Zoonotic/transmissible to cohabiting animals                                                                                                     | Correlation with climatic influence/ anthropogenic events                            | Key reference(s) |
|----------------------------|-----------------|------------------------|------------------------------------------------------------------------|--------------------------------------------------------------|--------------------------------------------------------------------------------------------------------------------------------------------------|--------------------------------------------------------------------------------------|------------------|
|                            |                 | Captive populations    | Wild populations                                                       |                                                              |                                                                                                                                                  |                                                                                      |                  |
| <i>Lactococcus garviae</i> | Tuscany, Italy  |                        | Green ( <i>Chelonia mydas</i> ), Loggerhead ( <i>Caretta caretta</i> ) | Detected using PCR;<br><br>No pathogenic studies carried out | Present in fish, molluscs and crustaceans<br><br>Identified in a bacterial epidemic in aquatic invertebrates, such as the giant freshwater prawn | Climate change may influence the threat levels associated with such exotic pathogens | (23)             |

\* (lesion, clinical sign and/or disease) symptom in individuals; ease of spread, rate of spread; diagnostic test or treatment, if available.

## 2.2.2. Non-infectious Hazards

Non-infectious diseases of sea turtles have been reported both in captivity and the wild (24), but little is known about the cause and extent of these diseases and their impact on the population (25). In this study, a broad range of health problems were described to form a basis for discussing their possible effects on the population. The groupings were adapted from the method used by George (1997) (24) and consisted of four main groups, namely physical, nutritional, anthropogenic and medical problems. Table 2 shows an example of a physical problem and associated information. The regions where the hazards were reported in the literature are listed along with the species that were affected either in captivity or in the wild. For each health problem, the following information was collected (if available): clear description of aetiology, reports of mortality/ morbidity, effect on individuals/populations and treatment availability.

Table 2 Example of a non-infectious health hazard summary in the group of physical problems/injuries.

| Non-infectious health hazard | Health Problem | Region Reported     | Species Affected   |                 | Aetiology, if clear; the effect on individuals, population, if known; treatment, if stated; mortality, morbidity if reported.                                                                                                                                                                                                                                                                                                                                                                                                                                                                                                                                                     | Key Reference(s) |
|------------------------------|----------------|---------------------|--------------------|-----------------|-----------------------------------------------------------------------------------------------------------------------------------------------------------------------------------------------------------------------------------------------------------------------------------------------------------------------------------------------------------------------------------------------------------------------------------------------------------------------------------------------------------------------------------------------------------------------------------------------------------------------------------------------------------------------------------|------------------|
|                              |                |                     | Captive Population | Wild Population |                                                                                                                                                                                                                                                                                                                                                                                                                                                                                                                                                                                                                                                                                   |                  |
| Physical Trauma              | Injuries       | Frequently reported | *                  | *               | <p>Due to predator bites, by-catch, boat strike or accidents</p> <p>May happen quite often and lead to infection, fractures and open fractures of a limb or of the shell, amputation of one or several limbs or minor wounds</p> <p>Mortality may occur if the injury is traumatic</p> <p>Appropriate modifications to vessel operation and configuration may reduce the threats</p> <p>Aggressive males may bite females during mating</p> <p>Captive turtles are prone to injuries in overcrowded facilities</p> <p>Existence of rehabilitation centres in the area to surrender injured or caught turtles for healing period followed by releasing may help the population</p> | (26-28)          |

\* There is not enough information about the species or the region

### 2.3. Risk assessment

Two workshops involving experts with a broad range of expertise were convened to systematically execute the risk assessment step. The consultation process was conducted in a formal and structured manner following an established protocol for a DRA (see Appendix 2 for workshop workbook and questionnaire) (11, 29). Human ethics approval for this study was granted by James Cook University Human Ethics Committee, permit number H6834. The two international workshops were: 1) the Turtle Health & Rehabilitation Workshop, September 2017, Townsville, Australia, that was attended by 25 participants mainly from South Africa and the Australasia region and 2) the Medicine Workshop at the International Sea Turtle Symposium 2018, Kobe, Japan, where the 35 participants were from a broader range of regions and both hemispheres. The participants were veterinarians, microbiologists, members of the International Sea Turtle Society (ISTS) and IUCN Sea Turtle Specialist Group (MTSG) IUCN SSC Wildlife Health Specialists Group member and Widecast Coordinator (Saint Martin/Saint Barthelemy FWI) who are working on sea turtle research and



conservation. Discussions among participants centred on the relevance, significance and 223  
prioritisation of infectious and non-infectious hazards. 224

The list of hazards, compiled in the review of the literature, were presented to the groups of 225  
specialists in sea turtle health. The “*Paired Ranking Tool*” was used to prioritise the top three 226  
hazards from each group according to a conservation, surveillance and research perspective (6, 11). 227  
The paired ranking tool is a decision-making tool which is fully explained in Armstrong *et al.* (29) and 228  
Jakob-Hoff *et al.* (11). The main goal of this technique is working out the relevant importance of the 229  
hazards. As mentioned by Jakob-Hoff *et al.* (11): “This is a tool for a qualitative risk analysis that 230  
assists groups to rank hazards based on their collective judgement.” The criteria used to compare 231  
the diseases were defined as: current knowledge of the pathogen in sea turtles, the likelihood of 232  
exposure/susceptibility, the pathogenic potential, the severity for populations and the correlation 233  
with climatic/anthropogenic events (6, 11). 234

#### 2.4. One Health considerations and DRA 235

Both One Health and the DRA process share common goals, which are addressing complex health 236  
issues and aiming to reduce disease risks through multidisciplinary collaborations (30). 237

To address One Health considerations in this DRA, zoonotic pathogens of sea turtles and the 238  
possibility of disease transmission to/from sea turtles were documented. The information about 239  
socioeconomic consequences of conservation initiatives or the general benefits of interaction with 240  
sea turtles were also collected and reviewed. 241

Two sections were dedicated to One Health in the expert workshops: one addressed infectious 242  
disease transmission and the other explored opinions about the socioeconomic values of interaction 243  
with sea turtles and the contributions to conservation. 244

#### 2.5. Risk management 246

Appropriate management interventions such as by-catch reduction, restrictions on commercial use 247  
and trade, and creation of protected habitats can allow recovery of a depleted population (31, 32). 248

This emphasises the importance of designing management with SMART (specific, measurable, 249  
achievable, realistic and time-based) goals (22). Disease risk management is the process of risk 250  
evaluation and identifying the measures that can be applied to reduce or eliminate the risk posed to 251  
the population of concern (33). To effectively reduce or eliminate the risks, the scale at which the 252  
management plans are evaluated and executed should be defined. Regional management units 253  
(RMUs) were developed for sea turtles to organise units of protection. These are functionally 254

independent and provide a framework to evaluate conservation status and to address management challenges (34).  
After defining the management unit, the risk management step suggests management options to reduce the risks that have been assessed and ranked in previous steps. These options are then evaluated according to their feasibility and effectiveness (11). However, often this is not the case and as the options may not be ideal the best available under the existing circumstances will be selected.  
Reducing the risk is not implemented under a “*single correct answer*” achieved from risk assessment, it is rather a step-by-step procedure that needs modification through communication and cross-governmental support as animals and their pathogens are not confined by political barriers but are distributed by topographic and ecological barriers (11, 33). This is especially true for migratory animals such as sea turtles (22).  
In most cases the risk assessment process is separate from the risk management implementation, merely because the scientists and veterinarians behind the risk assessment process are not policy or decision makers at government level (22). However, the ‘experts’ are the ones that understand the biology and the ecological systems under consideration. Therefore, they are the best people to identify the range of risk management options. The policy makers should then have input into the feasibility evaluation of the options proposed. Hence, this is best done collaboratively rather than separately as the two groups need each other’s perspectives to make the best decisions.  
A scientifically based, clear DRA can help the decision makers to prioritise the actions to reduce the disease risk (11). An understanding of the identified and assessed risk can facilitate practical and realistic interventions in the form of risk management of the most significant hazards (33).  
At the international workshops, the DRA protocols were used to structure discussions around the current risk management, its difficulties and defects for the highest ranked hazards based on globally identified challenges for risk management initiatives. As executing risk management for a specific scenario and in a defined region is more realistic than a global disease risk management for sea turtle populations, the local workshops facilitated further discussions with appropriate representatives from the Australian government. The risk management workshop took place in February 2019 at James Cook University, Townsville, Australia and aimed to identify possible pathways for local disease risk management. The attendees were provided with the DRA materials including the risk assessment results, a week prior to the meeting. The workshop workbook is provided in Appendix 3. The workshop was divided into two sections, the first part was discussing

management options for previously assessed risks and the second part was brainstorming to define 288  
critical control points for a mock clutch translocation. 289

290

### *2.5.1. Management options for previously assessed risks* 291

To follow the structure of the DRA, the management group selected two prioritised risks from the 292  
previous step “risk assessment”. These two were the most relevant risks to Townsville local 293  
conditions which were also the highest ranked hazards in previous steps. 294

The first risk was “*Enterobacteriaceae and multi-resistant bacteria*” from the infectious hazard 295  
group. In 2017, researchers from James Cook University (JCU) reported that Enterobacterial isolates 296  
from rehabilitated green turtles were significantly multidrug resistant which has an implication for 297  
conservation actions and the general health in the Great Barrier Reef (35). 298

The second risk was “*macro-plastic pollution*” from the non-infectious hazards. It has been reported 299  
that green turtles inhabiting the Queensland coast, and generally in Australia, are exposed to macro- 300  
and microplastic pollution and unfortunately ingest plastic debris (36). Generally, the risk of 301  
macroplastic ingestion is higher than that for microplastics. Macroplastic ingestion is a concern for 302  
conservation, ranked at the same level as other anthropogenic pressures such as by-catch (37). 303  
Management options were suggested for these two hazards by the attendees and effectiveness and 304  
feasibility were scored based on the discussions. 305

306

### *2.5.2. Critical control points for a mock clutch translocation.* 307

The translocation of animals for conservation purposes was the original and primary aim of 308  
establishing DRA (11). The problem description, scope of the risk, goals of risk analysis and the 309  
source of information will vary for each individual scenario. Here, the hazard is confined to the 310  
regions that “*animals are sourced from*” and the destination that “*the animals are going to be* 311  
*introduced to*” (38). The list of the hazards is mainly focused on the “*disease causing*” infectious and 312  
non-infectious agents. The risk assessment can be done through expert-involved discussions and 313  
scenario trees for a graphic representation of the specific translocation situation. Risk mitigation and 314  
contingency plans can be created with reference to the risk assessment. Finally, the stakeholders can 315  
plan for scientifically based, feasible and economic risk managements. 316

The checklist for conducting a wildlife translocation disease risk analysis (11, 39) was modified for a 317  
scenario of sea turtle clutch translocation and employed here as an example (See Appendix 1). Such 318  
procedures are relevant for hatching, captive rearing, rehabilitation and release of turtles, though 319

individual and local considerations must be taken into account for each scenario. One example is  
head-start program which is designed to increase hatching rate by captive rearing the sea turtle  
hatchlings and releasing them to the ocean when they are assumed to have higher survivorship (40).  
In the second part of the local workshop, risk management for a mock clutch translocation from an  
island to the mainland was assessed and the potential transmission pathways for infectious  
organisms were agreed on after discussing the modes of transportation of the eggs. The potential  
transmission pathways and the critical control points were then listed in a schematic representation  
on a whiteboard. Predation risk was also considered in the destination area and the potential  
hazards for a hatchery establishment were discussed.

## 3. Results

### 3.1. Hazard identification

Both infectious and non-infectious hazards were addressed and the complete list is available in  
Appendix 4-8. Here we consider only those pathogens and diseases that are important in the context  
of sea turtle conservation and have left out a large number of potential pathogens that would make  
the DRA unrealistic and unachievable (33). Still, this study identified a comprehensive list of  
infectious and non-infectious hazards for consideration in this DRA.

#### 3.1.1. Infectious disease

Previously undetected bacteria, viruses, parasites and fungi are frequently described in sea turtles  
and in new regions, but the health implications to sea turtles are not commonly addressed in the  
literature (8). In many cases, this makes it difficult to determine how high-risk some hazards are,  
highlighting the need for expert opinion. An exhaustive literature search identified the following  
information on possible hazards of interest to this DRA.

##### 3.1.1.1. *Bacteria*

Most bacterial species in sea turtles are opportunistic pathogens and have been reported as natural  
flora in fish, crustaceans and other marine animals (7). In early studies, bacterial pathogens formed  
the longest list of infectious hazards for sea turtles contributing to disease in captive, farmed and  
free-living sea turtles in many parts of the world (41-43). The list of bacterial pathogens has grown  
(see Appendix 5) in terms of diversity but not necessarily the prevalence and the effect on the  
population.

*Vibrio spp.*, *Pseudomonas spp.*, *Enterococcus spp.*, *Aeromonas*, *Cytophaga. freundii*, *Escherichia. coli*, 350  
*Edwardsiella spp.*, *Proteus spp.*, *Lactococcus garviae*, and *Providencia* have been recorded in sick sea 351  
turtles as either potential primary pathogens or opportunistic bacteria (23, 44). *Vibrio spp.* are the 352  
most frequently studied bacterial isolates in sea turtles (especially *Vibrio alginolyticus*) and are 353  
repeatedly isolated from skin lesions, digestive organs and respiratory tract associated with 354  
ulcerative stomatitis, obstructive rhinitis, and pneumonia along with *Aeromonas hydrophila*, 355  
*Pseudomonas fluorescens*, *Flavobacterium spp.*, and *Bacillus spp.* (41, 42, 45). Infection with these 356  
bacteria can also cause mortality in captive-reared and/or wild juvenile green and loggerhead turtles 357  
(41, 42). 358

Bacteria isolated in clinically healthy and wild-living turtles near urbanised areas show high levels of 359  
multidrug-resistance, indicating an accumulation of resistance in marine bacteria caused by 360  
exposure to anthropogenic factors. Of particular concern are the *Enterobacteriaceae* that are of One 361  
Health importance as potential zoonotic pathogens (35). 362

### 3.1.1.2. Fungi 364

Fungal pathogens of sea turtles are usually opportunistic saprophytes causing infection under 365  
favorable circumstances (46). Sea turtles in captivity or rehabilitation centres are prone to mycotic 366  
infections possibly due to other underlying health issues or immunosuppressive conditions (7). 367  
*Fusarium* species have been isolated from cutaneous abscesses (47), cutaneous or pneumonic 368  
lesions and bronchopneumonia (48). *Fusarium solani* is the most frequently identified fungus in sea 369  
turtle mycotic diseases, and is normally isolated and referred to as a 'species complex' including 370  
more than 60 phylogenetic species (48). *Fusarium* is widely distributed in soil and waste; it tends to 371  
enter the body through lesions, causing mycosis in humans and animals (48, 49). *Fusarium* infections 372  
are a common pathological finding in sea turtle eggs; *Fusarium oxysporum*, *F. solani* and 373  
*Pseudallescheria boydii* were isolated from failed eggs found in eastern Australian loggerhead, green, 374  
hawksbill (*Eretmochelys imbricata*) and flatback (*Natator depressus*) nests (50). *Fusarium falciforme* 375  
and *Fusarium keratoplasticum* were believed to reduce the hatching success to 10% per infected 376  
clutch (48). Environmental stressors such as inundation (flooding of nest) and oxygen depletion 377  
seem to enhance the incidence of fungal infection and mortality of embryos (48). However, Phillott 378  
and Parmenter (51) determined that the fitness of the hatched green turtles was not affected by 379  
fungal colonisation of the nest. Sporadic opportunistic fungal infections are reported in sea turtles. 380  
These fungi are not true pathogens of reptiles and are usually not associated with systemic infection 381  
or mortality unless the immune system is compromised (52). 382

### 3.1.1.3. Parasites 383

A variety of parasites infect sea turtles, primarily digenetic trematodes and nematodes (53). 384  
Different factors influence the extent of damage a parasite may cause, such as the species of 385  
parasite and the general fitness of the host, habitat and availability of intermediate host (53, 54). 386  
The gastrointestinal flukes (digeneans of the family Pronocephalidae) and cardiovascular flukes 387  
(Spirorchidae) are the most prevalent trematodes in sea turtles (53, 55). Gastrointestinal flukes are 388  
widely distributed throughout the gastrointestinal tract without any apparent ill effect. 389  
Cardiovascular flukes, on the other hand, cause pathological effects in the circulatory system and 390  
multiple internal organs (53). The first definitive life cycle for a species of blood flukes in sea turtles 391  
was recently described with vermetid snails as the intermediate hosts for *Amphiorchis sp* (56). 392  
In the nematode group, Anisakidae and Kathlanidae have been reported to infect sea turtles and are 393  
mainly found in the gastrointestinal tract of loggerhead turtles (54, 57). In Australia, the coccidian 394  
parasite *Caryospora cheloniae* and Spirorchids are reported to be the parasites of highest concern 395  
as they are associated with disease and high mortality rates under certain conditions (58). Of the 396  
two parasites, Spirorchids is reported to be more common and widespread (59). 397  
Sea turtles are the definitive host for some of these parasites, but how host-specific or harmful these 398  
parasites are to the host is not known. *Lophotaspis valley*, *Learedius learedi* and *Styphlotrema* 399  
*solitaria* are some species-specific trematodes in sea turtles, while *Plesiochorus cymformis*, 400  
*Rhytidodes gelatinosus*, *Enodiotrema carettae* and *Pleurogonius trigonocephalus* have a wider host 401  
range (53). 402

### 3.1.1.4. Viruses 404

Reptile virology is a relatively new field (60); however, increased awareness and advances in 405  
molecular technology will undoubtedly bring about an increase in the knowledge and identification 406  
of new species (61). The link between the presence of herpesvirus or ranavirus and clinical disease in 407  
chelonians are well established, whereas the link between disease and causative pathogen is still 408  
being explored for other viruses (60). To date, members of *Herpesviridae* are the only causative 409  
agents of viral diseases investigated in sea turtles. The presence of other viruses in sea turtles are 410  
sporadically reported: with one published report for each of tornovirus, retrovirus and 411  
betanodavirus (23, 62-64) and two reports of papillomaviruses (62, 65). 412  
Herpesviruses cause severe diseases in chelonians, especially in animals in stressful situations with 413  
associated lower immune function (66). Gray-patch disease (GPD), lung-eye-trachea disease (LETD) 414

and fibropapillomatosis (FP) are herpesvirus-associated diseases frequently described in sea turtles 415  
(19, 67-69). 416  
GPD was reported in captive reared green turtles (less than year old) causing gray skin lesions. 417  
Overcrowded hatcheries and higher water temperatures appears to worsen the symptoms (70). 418  
LETD, another disease of green turtles (over one year old) was first described from turtles in captivity 419  
and then found in free ranging green turtles (71-73). 420  
Fibropapillomatosis is a neoplastic disease affecting all species of sea turtles (74-77). Tumour growth 421  
can be both external and internal, with juvenile turtles appearing to be most susceptible. Moreover, 422  
infected turtles are vulnerable to secondary infections and opportunistic pathogens due to 423  
immunosuppression (75, 77). Environmental factors may contribute to the expression and the 424  
severity of the disease (75, 78, 79). The disease was first reported in an aquarium in New York (80), 425  
but is now reported globally in tropical waters (44, 77, 81-83). 426

### 3.1.2. Non-infectious diseases 428

Turtles are affected by a variety of non-infectious diseases occurring either as a direct result of 429  
natural or man-made threats (24), or they may act as multifactorial influences on disease outcome. 430  
In some cases, it is not easy to determine if clinical signs are caused by an infectious or non- 431  
infectious agent. Infection with coccidia can elicit neurological diseases, but neurological symptoms 432  
can also be caused by head injury or natural causes such as toxins and algal bloom (84). 433  
Serious alterations in the balance between the environment, the host and the pathogens can trigger 434  
or spread disease in a population (11, 85, 86). For example, loss of seagrass habitat due to human 435  
disturbances or severe weather events can influence water quality and lead to immunosuppression 436  
due to starvation (87, 88). Anthropogenic effects such as habitat degradation, coastal light 437  
disturbance, pollution, and by-catch are known threats posed to sea turtles and are ranked highest 438  
in terms of adverse effects they may have for sea turtle populations (89, 90). The flow-on effect of 439  
habitat disturbance for turtles are likely to facilitate the emergence of infectious diseases at 440  
increasing incidences and exacerbate the risk of local population extirpation (87). 441

#### *3.1.2.1. Trauma and injuries* 443

Traumatic injuries are a major cause for stranding and may be caused by a range of factors from 444  
boat strikes and entanglement to shark bite or mating injuries (42, 90, 91). In the French Caribbean 445  
for example, boat strikes appear to occur at a higher rate in the past few years (personal interview 446

with the veterinarian in Saint Barthelemy/Saint Martin FWI). The incidences are lethal in the majority of cases with a very low survival rate (1/10 sea turtles survived after intensive veterinary care at Saint Barthelemy/Saint Martin FWI in 2019).

In addition to direct lethal effects on individual turtles, open wounds are a portal of entry for pathogenic microorganisms into the turtle (90). Perforating fishing hooks, plastics and fish spines can cause injuries in the gastrointestinal tract and respiratory system after ingestion (8, 90).

Decompression sickness was also recently diagnosed in loggerhead turtles captured in trawl and gill nets in the Mediterranean Sea (92).

### *3.1.2.2. Debilitated Turtle Syndrome (DTS) and cold stunning*

Debilitated Turtle Syndrome (DTS) is used to describe the condition of a turtle with several of the following symptoms: emaciation, lethargy, hypoglycaemia, anaemia, and heavy coverage with epibiota (93). Secondary infections are common in turtles with DTS, and turtles may be immunosuppressed (94). A wide range of morphometric and metabolic variables is documented for chronically debilitated loggerhead turtles in the southeastern United States (93). The main cause of DTS is not clear but cold stunning in some cases is an initial trigger (95, 96). Occasionally, large numbers of strandings are reported due to cold stunning based on the personal interviews with rehabilitation centres from Dubai, UAE; Kish Island, Iran; New York, USA; Lampedusa, Italy in 2017. Epibiota can increase rapidly in numbers when turtles are floating or immobilised and due to the invasive nature of some species of these epibionts, they can be detrimental to health. A high load of epibionts can lead to erosion in the carapace and plastron creating a portal of entry for secondary invaders (8).

### *3.1.2.3. Gastrointestinal disorders*

Gastrointestinal disorders are one of the main concerns for sea turtles in rehabilitation centres (35). Gastrointestinal obstruction by debris such as plastic are a clear risk for turtles (97, 98). However, gut impaction and faecoliths are also observed in stranded sea turtles with no obvious or physical cause (8). Climatic events may alter the foraging grounds for turtles and thereby affect their nutritional choices (99), but physical trauma, high parasitic load or chronic diseases can lead to loss of appetite, nutritional deficiencies and cachexia (24). Nutritional disorders can in turn affect the hepatobiliary system (8).



*3.1.2.4. Diseases caused by chemical and organic pollutants* 479

Pollution can cause immune suppression and thereby increase vulnerability to pathogens (85). 480  
Organic agricultural waste can elevate the nutrient level in the ocean and stimulate harmful algal 481  
and cyanobacterial blooms which can directly or indirectly harm turtles or exacerbate the effects of 482  
other diseases such as FP (100-102). In addition, long living animals, such as sea turtles, face the risk 483  
of accumulating these pollutants in their tissues over time and as a result the impact of toxicity may 484  
intensify (90). 485

Chemical debris and organic pollutants can block the gastrointestinal tract and cause different 486  
problems such as accumulation of intestinal gas, local ulcerations, interference with metabolism and 487  
immune function and intoxication (97, 98, 102). Plastic is an example of an accumulating pollutant 488  
and sea turtles tend to ingest plastic debris (103) which may block the gastrointestinal tract, 489  
accumulate intestinal gas, cause local ulcerations and interfere with metabolism (97, 104). 490  
Gastrointestinal obstruction may lead to chronic debilitation and eventually death (105). Cases of 491  
secondary infection and mortality are frequently reported due to plastic ingestion (104, 106). 492

Anthropogenic non-infectious diseases are the biggest challenge to sea turtle conservation (8, 107). 493  
494

*3.2. Risk assessment* 495

To assess the disease hazards outlined above using expert opinion, group and forum discussions 496  
were facilitated and encouraged in the workshops. The discussion sessions, which formed the basis 497  
for the rankings, were an opportunity for the participants to explain their personal experiences with 498  
disease encounters and to improve the general knowledge of the participants about regional 499  
differences in disease manifestation. One point that was repeatedly mentioned was the "*quality of* 500  
*information available*" and how this affected the ranking. It is worth mentioning that this is a feature 501  
of all wildlife DRAs and the process enables information gaps to be identified and the level of 502  
uncertainty made explicit. Such level of confidence by experts is referred to in Pacioni's ranking 503  
criteria as "*levels of knowledge*" (6). 504

The top three hazards from each group of infectious and non-infectious hazards were ranked 505  
according to a conservation, surveillance and research perspective (Table 3). 506

507  
508  
*Table 3 The three highest ranked hazards of each infectious and non-infectious groups as determined by panels of experts in* 509  
*two international workshops. A) Turtle Health & Rehabilitation Workshop, September 2017, Townsville, Australia, B)* 510  
*Medicine workshop at the International Sea Turtle Symposium 2018, Kobe, Japan* 511

|                                                                                              |
|----------------------------------------------------------------------------------------------|
| <b>A. Turtle Health &amp; Rehabilitation Workshop, September 2017, Townsville, Australia</b> |
|----------------------------------------------------------------------------------------------|

| Hazard                                                                                  |                                                                                                   | Notes                                                                                                                                                                               |
|-----------------------------------------------------------------------------------------|---------------------------------------------------------------------------------------------------|-------------------------------------------------------------------------------------------------------------------------------------------------------------------------------------|
| <b>Infectious health hazards</b>                                                        |                                                                                                   |                                                                                                                                                                                     |
| Parasite                                                                                | <i>Spirochiidae</i>                                                                               | Widespread, virulent and prevalent                                                                                                                                                  |
|                                                                                         | <i>Caryospora cheloniae</i>                                                                       | Virulent and episodic                                                                                                                                                               |
|                                                                                         | <i>Ozobranchus branchiatus</i>                                                                    | Possible vector for FP associated herpesvirus                                                                                                                                       |
| Virus                                                                                   | Chelonid alphaherpesvirus 5 (ChHV5)                                                               | Associated with fibropapillomatosis: reported in all species, can cause debilitating syndrome and be life threatening                                                               |
|                                                                                         | <i>Chelonia mydas</i> papillomavirus (CmPV-1) and <i>Caretta caretta</i> papillomavirus (CcPV-1): | Skin lesions, data deficient                                                                                                                                                        |
| Gram negative bacteria                                                                  | <i>Vibrio spp.</i>                                                                                | Associated with ulcerative dermatitis, mortality reported; associated with hatching failure; possibly zoonotic for turtle meat and egg consumers.                                   |
|                                                                                         | <i>Pseudomonas spp.</i>                                                                           | Ulcerative stomatitis and dermatitis along with <i>Vibrio alginolyticus</i> ; associated with hatching failure; possibly zoonotic for meat and egg consumers                        |
|                                                                                         | <i>Escherichia coli</i>                                                                           | Antibiotic resistant; opportunistic pathogen; zoonotic                                                                                                                              |
| Gram positive bacteria                                                                  | Unfortunately there was not enough time to go through this list.                                  |                                                                                                                                                                                     |
| Fungal infection                                                                        | <i>Fusarium spp.</i> (mostly <i>Fusarium solani</i> )                                             | Contributing to hatching failure, pneumonia, necrotic skin lesions mostly in captivity; potentially zoonotic.                                                                       |
|                                                                                         | <i>Aspergillus spp.</i>                                                                           | Hatching failure, mycotic infections in hatchlings; mycotic infections in captivity                                                                                                 |
|                                                                                         | <i>Cladosporium spp.</i>                                                                          | hatching failure, infections in captivity                                                                                                                                           |
| <b>Non-infectious health hazards</b>                                                    |                                                                                                   |                                                                                                                                                                                     |
|                                                                                         | Anthropogenic: Habitat degradation                                                                | Malnutrition, by-catch and accidents                                                                                                                                                |
|                                                                                         | Environmental: Climate change                                                                     | Malnutrition, fibropapillomatosis and cold stunning or Debilitated Turtle Syndrome                                                                                                  |
|                                                                                         | Anthropogenic: Pollution/plastic                                                                  | Entanglement, external and internal injuries, debris ingestion and neurological diseases                                                                                            |
| <b>B. Medicine workshop at the International Sea Turtle Symposium 2018, Kobe, Japan</b> |                                                                                                   |                                                                                                                                                                                     |
| Hazard                                                                                  |                                                                                                   | Notes                                                                                                                                                                               |
| <b>Infectious health hazards</b>                                                        |                                                                                                   |                                                                                                                                                                                     |
| Parasite                                                                                | <i>Spirochiidae</i>                                                                               | Geographical wide distribution, various species, high prevalence, different effect in different life stages, adult, juvenile, eggs, severe lesions, causes stranding and mortality. |
|                                                                                         | <i>Annelids</i>                                                                                   | Wide geographical distribution, various species, Loggerhead, Olive Ridley and Green turtles are affected, cutaneous ulcerations, <i>Ozobranchus</i> possible vector for FP          |
|                                                                                         | <i>Arthropods</i>                                                                                 | Needs justification, worse in some regions, correlated to hatching failure and egg damage, causing mortality, regional reports                                                      |
| Virus                                                                                   | Herpesvirus                                                                                       | Tumours have been reported globally, ChHV5 is reported in clinically healthy turtles                                                                                                |
|                                                                                         | Papillomavirus                                                                                    | Only a few reports so far, not fully understood                                                                                                                                     |
| Bacteria                                                                                | <i>Methicillin-resistant Staphylococcus aureus (MRSA), E. coli and E. marginella</i>              | Multi-resistant strains, public health concern                                                                                                                                      |
|                                                                                         | <i>Streptococcus iniae, Salmonella typhimurium, E. coli.</i>                                      | Pathogenic and zoonotic                                                                                                                                                             |
|                                                                                         | <i>Pseudomonas spp. Klebsiella</i>                                                                | Mass mortalities, regional                                                                                                                                                          |
| Fungal infection                                                                        | <i>Fusarium solani</i>                                                                            | Problem for captive rearing, eggs and hatchling                                                                                                                                     |
|                                                                                         | <i>Penicillium spp.</i>                                                                           | Recorded in several areas, multi species infection recorded, different stages of life can be affected                                                                               |
|                                                                                         | <i>Cladosporium spp.</i>                                                                          | Recorded in several areas, may affect several life stages                                                                                                                           |
| <b>Non-infectious health hazards</b>                                                    |                                                                                                   |                                                                                                                                                                                     |
|                                                                                         | Anthropogenic                                                                                     | Human interactions are increasing, plastic ingestions are increasing                                                                                                                |

|                                                                                                                                                                                                                                                                                                                                                                                                                                                                                                                                                                                                                                                                                                                                                                                                                                                                                                                                                                                                                                                                                                                                                                                                                                                                                                                                                                                                                                                                                                                          |               |                                                         |                                                                                                              |
|--------------------------------------------------------------------------------------------------------------------------------------------------------------------------------------------------------------------------------------------------------------------------------------------------------------------------------------------------------------------------------------------------------------------------------------------------------------------------------------------------------------------------------------------------------------------------------------------------------------------------------------------------------------------------------------------------------------------------------------------------------------------------------------------------------------------------------------------------------------------------------------------------------------------------------------------------------------------------------------------------------------------------------------------------------------------------------------------------------------------------------------------------------------------------------------------------------------------------------------------------------------------------------------------------------------------------------------------------------------------------------------------------------------------------------------------------------------------------------------------------------------------------|---------------|---------------------------------------------------------|--------------------------------------------------------------------------------------------------------------|
|                                                                                                                                                                                                                                                                                                                                                                                                                                                                                                                                                                                                                                                                                                                                                                                                                                                                                                                                                                                                                                                                                                                                                                                                                                                                                                                                                                                                                                                                                                                          | Environmental | Climate change effects and also cold stunning           | 512                                                                                                          |
|                                                                                                                                                                                                                                                                                                                                                                                                                                                                                                                                                                                                                                                                                                                                                                                                                                                                                                                                                                                                                                                                                                                                                                                                                                                                                                                                                                                                                                                                                                                          | Medical       | Aftermath of anthropogenic and environmental incidences | 513                                                                                                          |
| <p>Although the outcome from the two workshops are very similar, there were a few differences, which could reflect the broader geographical origins of participants in Workshop B compared with Workshop A. In Workshop B the experts working on parasites ranked the hazards based on overarching classification, while participants in Workshop A gave species names to the parasites. In both workshops, Spirorchiids were considered important due to their widespread presence and potential virulence. Ozobranchid leeches were also mentioned by both groups due to their possible role in FP transmission. Viral pathogens were considered to be data-deficient by participants in both workshops, but both groups listed herpesvirus and papillomavirus as the highest-ranking pathogens. Antibacterial resistance and the associated public health concern were also consistently mentioned in the two workshops for the bacterial category. In Workshop A, the participants chose to focus on Gram negative bacteria only. <i>Fusarium</i> and <i>Cladosporium</i> spp. were selected by both groups as the most important fungal pathogens, mainly for eggs on nesting beaches and hatchlings in captive situations. Climate change and anthropogenic impacts scored highest in non-infectious health hazards in both workshops and there was consensus, that anthropogenic influences on turtle health need the highest attention of all groups, both in terms of research and conservation management.</p> |               |                                                         | 514<br>515<br>516<br>517<br>518<br>519<br>520<br>521<br>522<br>523<br>524<br>525<br>526<br>527<br>528<br>529 |
| <p><b>3.3. One Health and DRA</b></p>                                                                                                                                                                                                                                                                                                                                                                                                                                                                                                                                                                                                                                                                                                                                                                                                                                                                                                                                                                                                                                                                                                                                                                                                                                                                                                                                                                                                                                                                                    |               |                                                         | 530                                                                                                          |
| <p><b>3.3.1. Sea turtle and One Health consideration in the literature</b></p>                                                                                                                                                                                                                                                                                                                                                                                                                                                                                                                                                                                                                                                                                                                                                                                                                                                                                                                                                                                                                                                                                                                                                                                                                                                                                                                                                                                                                                           |               |                                                         | 531                                                                                                          |
| <p>Sea turtles mostly encounter humans during harvest, on nesting beaches and in rehabilitation centres. Figure 3 shows the main sources of interaction between humans, sea turtles and the environment. These interactions can positively or negatively impact the stakeholders.</p>                                                                                                                                                                                                                                                                                                                                                                                                                                                                                                                                                                                                                                                                                                                                                                                                                                                                                                                                                                                                                                                                                                                                                                                                                                    |               |                                                         | 532<br>533<br>534<br>535                                                                                     |
| <p><i>Fig 3 The schematic interactions between sea turtles, humans, co-habiting animals and the environment</i></p>                                                                                                                                                                                                                                                                                                                                                                                                                                                                                                                                                                                                                                                                                                                                                                                                                                                                                                                                                                                                                                                                                                                                                                                                                                                                                                                                                                                                      |               |                                                         | 536<br>537                                                                                                   |
| <p><b>3.3.1.1. Zoonosis</b></p>                                                                                                                                                                                                                                                                                                                                                                                                                                                                                                                                                                                                                                                                                                                                                                                                                                                                                                                                                                                                                                                                                                                                                                                                                                                                                                                                                                                                                                                                                          |               |                                                         | 538                                                                                                          |
| <p>As an example of zoonotic infections, vibriosis in humans may develop due to consumption of contaminated meat and eggs (108). Field workers should consider disinfecting any wound received while handling sea turtles as there is the risk of infection with <i>Mycobacterium</i>, <i>Salmonella</i>, <i>Vibrio</i>, and <i>Chlamydia</i> species due to contact with infected animals (68). There are also reports of fish pathogens in sea turtle which are of concern to aquaculture and the sea food industry (23).</p>                                                                                                                                                                                                                                                                                                                                                                                                                                                                                                                                                                                                                                                                                                                                                                                                                                                                                                                                                                                          |               |                                                         | 539<br>540<br>541<br>542<br>543                                                                              |

*Fusarium solani* can infect egg clutches, and high mortality rates are reported due to infection with this species of fungi. Being zoonotic, this pathogen poses a threat to the person handling the infected eggs as well. Such activities may take place while eggs are collected for consumption or in the hatcheries or on nesting beaches when the nests are cleaned out after the eggs are hatched. Dead/decomposing embryos are sources of nutrients for bacterial and/or fungal growth (109). Toxins may not necessarily be categorised as zoonotic agents but can have ill effects on humans. Sea turtles are exposed to toxins of either anthropogenic or natural origins, which may accumulate in their tissues and cause problems for meat and egg consumers (108). There are multiple reports of death, mass poisoning or sickness in a community after feasting on turtle meat (110-112). The condition is termed *chelonitoxication* and appears to be caused by the consumption of particular sea turtle species (green, hawksbill and leatherback turtles). Children are more prone to intoxication and its lethal effects (110-112). Humans can be the source of infection for sea turtles too. Examples of *Salmonella* and *Vibrio alginolyticus* transmission in captivity have been reported several times (7, 43-45, 113, 114). Humans are also posing an indirect threat to sea turtle health, via habitat destruction, distribution of pollutants, plastic and toxins (15, 16).

### 3.3.1.2. Cultural significance and sustainable conservation measures

Sea turtles are of great cultural value for indigenous communities (115). Humans and their environment co-evolve, and local culture and traditions reflects this relationship. The legally recognised rights of indigenous communities to interact with sea turtles in line with their traditions is the foundation for a community-based conservation management where alternatives to hunting is introduced in consultation with the local communities (e.g. Caribbean Coast of Nicaragua) (116). Such policies reduce the fear of arrest or reprisals while participating in local customs (116) which in turn enhances the feeling of control over their lives and improves community health. Market-based solutions towards conservation and providing alternatives for consumption of sea turtle products have been successful in several projects such as the Tartarugas Marinhas (TAMAR) project sites in Brazil, and at Tortugeuro, Costa Rica (116). At these locations the hunting has decreased, while ecotourism-based activities have been organised for local communities. Other non-governmental organisations (NGOs) have also formed and evolved in various regions of the world to promote conservation with the help of local communities. One such example is New Idea in Hormozghan, Iran (in Persian: moassese ide no doostdare hormozgan) which was successful in eliminating egg harvest for overseas markets. The turtle nesting site is now an ecotourism destination with a financial return for the local community (personal interview with Maryam Eghbali

the co-founder, 2017). A pro-environment establishment, Grupo Tortuguero, was formed in the Pacific Ocean in response to poaching and retaining the turtles after accidental catch by fishermen. The establishment is active in terms of education, funding and empowerment in response to loss of sea turtles, especially loggerheads (117).

Governments can also work in partnership with traditional owners to manage and conserve species. In Australia, Traditional Owner groups can develop an agreement on how they will manage traditional activities on their sea country. This agreement, or Traditional Use of Marine Resources Agreement (TUMRA), details how Traditional Owner groups wish to manage their take of natural resources (including protected species). This extends to their role in compliance and in monitoring the condition of plants and animals, and human activities, in the Great Barrier Reef Marine Park. Once developed, a TUMRA can then be accredited by the state and federal governments (118).

When sea turtle conservation does not limit people's ability to interact with sea turtles, it can have a positive impact on communities. Moreover, such conservation efforts can impact on the entire social-ecological system in which both turtles and humans are embedded (116). Sea turtle conservation plans must therefore articulate with diverse cultural, political and socioeconomic needs (119). This poses a challenge to management policies and raises important questions about the purpose of research and conservation endeavours (22). As an example, in a recent publication by Barrios-Garrido *et al.* (119), the conflicts related to sea turtle conservation programs in the Caribbean basin were identified. Dissimilar conservation objectives between local communities, non-governmental and governmental organisations were identified, along with lack of resources such as trained individuals for monitoring and enforcement roles, and scarce funding (119). The suggested solutions for these conflicts were rationalising the problem and promoting a mutual agreement based on common beliefs. Such multi-scale solutions would be achievable by co-management through bottom up (community based) actions and top-down changes (government policy) (119).

### 3.3.2. Sea turtle health and One Health according to expert opinion

Several experts presented their experiences or One Health related case studies to share their specific challenges and the way they address these issues. The One Health discussions in the workshop centered around the transmission of pathogens between sea turtles in the wild and captivity, non-infectious disease transmission between humans and turtles and the cultural/socioeconomic aspects of sea turtle conservation. Ultimately, the expert opinion on disease transmission was consistent with the literature (Table 4).

Table 4 One Health consideration in disease risk analysis workshop. A) Transmission of pathogens between sea turtles in the wild and in captivity. B) Non-infectious disease transmission between human and sea turtle. C) Cultural values of sea turtles and socioeconomic aspects of sea turtle conservation.

610  
611  
612

| <b>A. Transmission of pathogens between sea turtles in the wild and in captivity</b>                                                                                                                                                                                                                                                                                                                                                                                                                                                                                                                                                                                                                                                                                                                                                                                    |                                                                                               |                                                                         |                                                           |                                                                           |
|-------------------------------------------------------------------------------------------------------------------------------------------------------------------------------------------------------------------------------------------------------------------------------------------------------------------------------------------------------------------------------------------------------------------------------------------------------------------------------------------------------------------------------------------------------------------------------------------------------------------------------------------------------------------------------------------------------------------------------------------------------------------------------------------------------------------------------------------------------------------------|-----------------------------------------------------------------------------------------------|-------------------------------------------------------------------------|-----------------------------------------------------------|---------------------------------------------------------------------------|
| <b>Pathogens</b>                                                                                                                                                                                                                                                                                                                                                                                                                                                                                                                                                                                                                                                                                                                                                                                                                                                        | <b>Main zoonotic pathogens of concern from turtles to humans</b>                              | <b>Pathogens being naturally transferred from humans to sea turtles</b> | <b>Main problematic pathogen in captivity for turtles</b> | <b>Pathogens to be considered as a risk for aquaculture and fisheries</b> |
| Bacteria                                                                                                                                                                                                                                                                                                                                                                                                                                                                                                                                                                                                                                                                                                                                                                                                                                                                | <i>Salmonella</i><br><i>Vibrio spp.</i><br><i>Pseudomonas spp.</i><br><i>Escherichia coli</i> | Very unlikely                                                           | Opportunistic bacteria                                    | Data deficient                                                            |
| Fungi                                                                                                                                                                                                                                                                                                                                                                                                                                                                                                                                                                                                                                                                                                                                                                                                                                                                   | <i>Fusarium (especially F. solani)</i><br><i>Aspergillus</i>                                  | Data deficient                                                          | <i>Fusarium (esp. F. solani)</i>                          | <i>Trichophytea spp.</i>                                                  |
| Parasites                                                                                                                                                                                                                                                                                                                                                                                                                                                                                                                                                                                                                                                                                                                                                                                                                                                               | Not a concern to date                                                                         | Not a concern to date                                                   | Cryospora                                                 | Data deficient                                                            |
| Viruses                                                                                                                                                                                                                                                                                                                                                                                                                                                                                                                                                                                                                                                                                                                                                                                                                                                                 | Not a concern to date                                                                         | Not a concern to date                                                   | Herpesvirus                                               | Herpesvirus                                                               |
| <b>B. Non-infectious disease transmission between humans and sea turtles</b>                                                                                                                                                                                                                                                                                                                                                                                                                                                                                                                                                                                                                                                                                                                                                                                            |                                                                                               |                                                                         |                                                           |                                                                           |
| <b>Human to turtles</b>                                                                                                                                                                                                                                                                                                                                                                                                                                                                                                                                                                                                                                                                                                                                                                                                                                                 |                                                                                               | <b>Turtles to humans</b>                                                |                                                           |                                                                           |
| Biotoxin pollution<br>Plastic pollution<br>Boat strike, by-catch                                                                                                                                                                                                                                                                                                                                                                                                                                                                                                                                                                                                                                                                                                                                                                                                        |                                                                                               | Toxins in egg and meat                                                  |                                                           |                                                                           |
| <b>C. Cultural values of sea turtles and socioeconomic aspects of sea turtle conservation.</b>                                                                                                                                                                                                                                                                                                                                                                                                                                                                                                                                                                                                                                                                                                                                                                          |                                                                                               |                                                                         |                                                           |                                                                           |
| Cultural dimensions of interacting with sea turtles have recently been brought to the attention of conservationists:                                                                                                                                                                                                                                                                                                                                                                                                                                                                                                                                                                                                                                                                                                                                                    |                                                                                               |                                                                         |                                                           |                                                                           |
| <ul style="list-style-type: none"> <li>Rescue plans are rewarding for volunteers, rangers and people who are involved.</li> <li>In the Caribbean, the conservationists' goal is to interact with the locals and to allow traditional harvest in sustainable manners. However, in some island such as French Caribbean Sea turtles are fully protected for nearly 30 years and the harvest is absolutely prohibited.</li> <li>In the Maldives, sea turtles can be kept as pets". The consulted expert emphasised the special bond between the turtles and humans.</li> <li>In the French Mediterranean, the aim is to involve fishermen in conservation initiatives to reduce the threat of by-catch.</li> <li>In Australia, sea turtles are significant elements of indigenous culture and any conservation plans is considering their traditional expertise</li> </ul> |                                                                                               |                                                                         |                                                           |                                                                           |
| Socioeconomic advantage of sea turtle conservation which need more attention:                                                                                                                                                                                                                                                                                                                                                                                                                                                                                                                                                                                                                                                                                                                                                                                           |                                                                                               |                                                                         |                                                           |                                                                           |
| <ul style="list-style-type: none"> <li>Tourism value of healthy turtle population has not been evaluated</li> <li>Turtle watching tours are alternatives for fishing and has been successfully established in some regions.</li> <li>Job generation through alternative projects may reduce poaching but needs more research.</li> <li>Outreach opportunities to groups that are interested but not normally involved in sea turtle conservation</li> <li>Sea turtles are charismatic species and on third highest ranked animal for conservation initiatives.</li> </ul>                                                                                                                                                                                                                                                                                               |                                                                                               |                                                                         |                                                           |                                                                           |
| Turtles are indicators of environmental health, but the association between their health and the environmental health need more research and potentially funding.                                                                                                                                                                                                                                                                                                                                                                                                                                                                                                                                                                                                                                                                                                       |                                                                                               |                                                                         |                                                           |                                                                           |

613  
614

It was agreed that *Fusarium solani* is the main concern for turtles in captivity and a threat to egg and meat consumers. In the non-infectious category, chelonitoxication and the mass poisoning it causes was considered of great importance. The pathogen transmission routes need further research to better understand the mechanisms at play. New hatcheries are being established in some areas to take economic advantage of tourism, without following strict hygiene protocols (e.g. wearing gloves while handling the eggs and hatchlings or relocating nests) and the biological needs for the eggs to hatch (e.g. the correct temperature, adequate depth of the nest, how to handle the eggs). Another example is hand-feeding of sea turtles in the wild. Local guides or fishermen in some areas of the Canary Islands and Bahamas were reported to feed the turtles in the wild and there is concern about the health and behavior of the turtle population after being habituated to people.

In the workshop, the discussion about the cultural dimensions of interacting with sea turtles or the importance for indigenous groups concluded that there was a lack of knowledge in this field among the participants which highlighted the need for more social science studies. However, the social scientists present in the workshop shared their experience in this field. Social science experts work directly with the communities that interact with sea turtles. According to their experience, sea turtle conservation brings the communities together and gives them a common cause and sense of belonging to the environment.

These results highlight the multiple and intersecting One Health considerations in sea turtle conservation which should be considered in effective sea turtle management plans.

### 3.4. Risk Management

#### 3.4.1 International workshops

The current global management for the highest ranked hazards in risk assessment step are reported (Table 5) along with the difficulties and defects for each strategy. One Health considerations are also reported however, data deficiency about zoonosis and biotoxicity limit the ability to provide recommendations to egg and meat consumers. Several management options were suggested for socioeconomic aspects of interacting with sea turtles, however this list provided here is not exhaustive.

Table 5 Current risk management for sea turtle disease hazards with notes on difficulties and defects. A) Infectious diseases. B) Non-infectious diseases. C) One Health

| A. Infectious diseases |                                              |                                   |
|------------------------|----------------------------------------------|-----------------------------------|
| Hazard                 | Current management                           | Difficulties and defects          |
| Parasites:             | sporadic and opportunistic in rehabilitation | Data deficient, limited number of |

|                                                                                                                                                   |                                                                                                                                                                                                                                                                                                                                                                                                         |                                                                                                                                                  |
|---------------------------------------------------------------------------------------------------------------------------------------------------|---------------------------------------------------------------------------------------------------------------------------------------------------------------------------------------------------------------------------------------------------------------------------------------------------------------------------------------------------------------------------------------------------------|--------------------------------------------------------------------------------------------------------------------------------------------------|
| <i>Spirochiidae</i> ,<br><i>Caryospora cheloniae</i> ,<br><i>Ozobranchus branchiatus</i><br>Arthropod spp.                                        |                                                                                                                                                                                                                                                                                                                                                                                                         | experts in this area, the diagnostic tests are not performed in many regional management units                                                   |
| Bacteria:<br><i>Vibrio spp.</i> , <i>Pseudomonas spp.</i> ,<br><i>Escherichia coli</i> , <i>MRSA</i> , <i>Klebsiella</i>                          | Sporadic and opportunistic in rehabilitation<br><br>More recent research on antibiotic resistant bacteria                                                                                                                                                                                                                                                                                               | Data deficient, limited number of experts in this area, the diagnostic tests are not performed in many regional management units                 |
| Fungi:<br><i>Fusarium solani</i> , <i>Aspergillus spp.</i> ,<br><i>Cladosporium spp.</i> , <i>Penicillium spp</i>                                 | Sporadic and opportunistic in rehabilitation<br>Quarantine and hygiene in captivity                                                                                                                                                                                                                                                                                                                     | Data deficient, limited number of experts in this area, the diagnostic tests are not performed in many regional management units                 |
| Viruses:<br>Chelonid alphaherpesvirus 5 (ChHV5) <i>Chelonia mydas</i> papillomavirus (CmPV-1) and <i>Caretta caretta</i> papillomavirus (CcPV-1): | Surgery in some regions, continuous research on epidemiology and aetiology                                                                                                                                                                                                                                                                                                                              | Data deficient, limited number of experts in this area, the diagnostic tests are not performed in many regional management units                 |
| <b>B. Non-infectious diseases</b>                                                                                                                 |                                                                                                                                                                                                                                                                                                                                                                                                         |                                                                                                                                                  |
| <b>Hazard</b>                                                                                                                                     | <b>Current management</b>                                                                                                                                                                                                                                                                                                                                                                               | <b>Difficulties and defects</b>                                                                                                                  |
| Anthropogenic:<br>Habitat degradation,<br>Pollution/plastic                                                                                       | By-catch, accidents and entanglement:<br>Marine park and governmental policies in some regions to use turtle exclusion devices (TED), and avoid stainless steel fishing hooks, avoid trawling. Defining protected areas to avoid accidents.<br>Debris ingestion: Public involving workshops and programs to reduce plastic usage and littering near the ocean, and cleaning the beaches, rehabilitation | Region based, incompatible ethical and legal approaches across borders.                                                                          |
| Environmental:<br>Climate change                                                                                                                  | Debilitated Turtle Syndrome and cold stunning: Rehabilitation, training, educations                                                                                                                                                                                                                                                                                                                     | The capacity of rehabilitation is not enough in some regions with mass stranding; more research on treatment of specific conditions is required. |
| Medical                                                                                                                                           | Malnutrition: Rehabilitation<br>Neurological diseases: managing toxin emissions in some areas                                                                                                                                                                                                                                                                                                           | Neurological diseases: data deficiency.<br><br>Lack of health baseline data                                                                      |
| <b>C. One Health</b>                                                                                                                              |                                                                                                                                                                                                                                                                                                                                                                                                         |                                                                                                                                                  |
| <b>One Health consideration</b>                                                                                                                   | <b>Current management</b>                                                                                                                                                                                                                                                                                                                                                                               | <b>Difficulties and defects</b>                                                                                                                  |
| Zoonosis                                                                                                                                          | Expanding the knowledge and awareness of meat and egg consumers                                                                                                                                                                                                                                                                                                                                         | Sporadic reports                                                                                                                                 |
| Bio-toxins                                                                                                                                        | Expanding the knowledge and awareness of meat and egg consumers                                                                                                                                                                                                                                                                                                                                         | Data deficient, mass death of humans, but no test to rule out contamination. Often in remote areas                                               |
| Socioeconomic and cultural aspects of interacting with sea turtles                                                                                | Expanding ecotourism and turtle watching activities. Implementing alternative jobs to avoid overfishing and poaching. Defining and modifying “sustainable” hunting for cultural purposes. Spiritual and cultural wellbeing of communities with close relationships to environment. Involving the communities in conservation programs.                                                                  | Needs greater social science involvement                                                                                                         |



### 3.4.2 Local workshop 646

In the local risk management workshop, the overarching concern was inadequate communication 647  
between different sectors working on sea turtle surveillance and conservation. The attendees 648  
referred to the lack of comparable and accessible data for researchers, conservationists and 649  
government sections. The reason behind “data protection” or limited information sharing can be 650  
confidentiality, or variations in legislation for different organisations collecting such information. 651  
Nonetheless, such data protection impacts on the success of conservation initiatives. 652

653

#### 3.4.2.1. Management options for previously assessed risks 654

The management options to reduce the risk of 1) macroplastic pollution and 2) *Enterobacteriaceae* 655  
and multi-resistant bacteria were ranked based on effectiveness and feasibility on a scale of 10, with 656  
1 being the lowest and 10 being the highest. The results of these rankings are summarised in Table 657  
6. It is important to note that in almost all cases a final decision on option selection was beyond the 658  
scope of the group. 659

660

*Table 6 Risk management options and scoring the effectiveness and feasibility in the Townsville management workshop. A) Risk management options for Macroplastic pollution (effectiveness and feasibility reported from “1” the lowest to “10” the highest). B) Risk management options for Enterobacteriaceae and multi-resistant bacteria (effectiveness and feasibility reported from “1” the lowest to “10” the highest)* 661

662

663

664

665

| <b>1) Reducing the risk of microplastic pollution</b>                             |                      |                        |                                                                                                                                                                                                              |
|-----------------------------------------------------------------------------------|----------------------|------------------------|--------------------------------------------------------------------------------------------------------------------------------------------------------------------------------------------------------------|
| <b>Management options</b>                                                         | <b>Effectiveness</b> | <b>Feasibility</b>     | <b>Decision</b>                                                                                                                                                                                              |
| <b>eliminating the impacts of the macroplastic that has already been released</b> |                      |                        |                                                                                                                                                                                                              |
| Initiatives to alter disposal methods                                             | 7                    | 5                      | Beyond the scope of this group                                                                                                                                                                               |
| Initiatives to clean beaches                                                      | 7                    | 8                      | Beyond the scope of this group                                                                                                                                                                               |
| Installing storm drain filters                                                    | 9                    | 7                      | Beyond the scope of this group                                                                                                                                                                               |
| Research on engineering structures to remove macroplastics from the ocean         | 7                    | 3 (due to cost)        | Beyond the scope of this group                                                                                                                                                                               |
| Government policies                                                               | 8                    | 3 (political decision) | Beyond the scope of this group                                                                                                                                                                               |
| <b>Reducing further input of macroplastic in the environment</b>                  |                      |                        |                                                                                                                                                                                                              |
| Research on providing affordable biodegradable items                              | 7                    | 3                      | Beyond the scope of this group                                                                                                                                                                               |
| Education and awareness to reduce littering and purchasing of plastics            | 8                    | 9                      | This forms part of existing university subject curriculum, but needs to be addressed in primary and secondary schools as well. Not known to this group.<br>Great Barrier Reef Marine Park Authority (GBRMPA) |

|                                                                                                   |                      |                    |                                                                                                                                                                                                                                                           |
|---------------------------------------------------------------------------------------------------|----------------------|--------------------|-----------------------------------------------------------------------------------------------------------------------------------------------------------------------------------------------------------------------------------------------------------|
|                                                                                                   |                      |                    | ReefHQ is an education facility and can educate on this topic as well.                                                                                                                                                                                    |
| Governmental policies                                                                             | 8                    | 3                  | Beyond the scope of this group                                                                                                                                                                                                                            |
| <b>2) Reducing the risk of <i>Enterobacteriaceae</i> and multi-resistant bacteria</b>             |                      |                    |                                                                                                                                                                                                                                                           |
| <b>Management options</b>                                                                         | <b>Effectiveness</b> | <b>Feasibility</b> | <b>Decision</b>                                                                                                                                                                                                                                           |
| Education and awareness including personal and protective equipment when working with sea turtles | 9                    | 8                  | This option is doable and already in practice. The Department of Environment and Science and GBRMPA have staff that would be involved in egg and turtle relocation and would require Personal protective equipment (PPE) as part of their risk assessment |
| Education and awareness to reduce the prescription and consumption of antibiotics                 | 6                    | 8                  | Beyond the scope of this group                                                                                                                                                                                                                            |
| Sewage treatment and extracting the antibiotics from sewage water                                 | 7                    | 3                  | Beyond the scope of this group                                                                                                                                                                                                                            |

The management scale for macroplastic pollution can be as small as a school or as big as the Queensland state. The group suggested that it should be divided to two categories: 1) eliminating the impacts of the macroplastic that has already been released into the environment and 2) to reduce further input. For the first category, promotion of beach clean-up initiatives and rubbish collection; installing storm drain filters, which requires local and external donors and long-term monitoring; promotion of funding for large scale ocean clean-up projects. For the first category, the options to reduce the production and/or input included, but were not limited to: education and awareness to reduce littering and use of disposable plastics; research on providing affordable biodegradable items and; government policies targeted to eliminate the use of single use plastics such as that initiated in Queensland in 2018 (120).

For reducing the risk of *Enterobacteriaceae* and multi-drug resistant bacteria, the experts reiterated that a preventive solution which promotes education and awareness would be useful. This would include promoting personal and protective equipment when working with sea turtles. The experts also suggested that reducing the prescription and consumption of antibiotics would help manage this risk. The post-release management options included extracting the antibiotics from sewage water and promote funding for research into solutions for this procedure. The feasibility and effectiveness of these options were scored in Table 6.

### 3.4.2.2. Critical control points for a mock clutch translocation

The clutch translocation scenario and critical control point allocated by experts in the local management workshop are shown in Figure 4.

*Fig 4 The clutch translocation scenario, pathogen transmission pathways, lethal effects of predators and critical control points*

690  
691 Time management and temperature control were suggested to be critical for transporting the eggs.  
692 Personal protective equipment (PPE) and hygiene were proposed as the effective and feasible  
693 options to avoid the risk of pathogen transmission. Screening the relocation site for potential  
694 pathogens was suggested, however, the feasibility was ranked low. Nest protection and monitoring  
695 to reduce the risk of predation was critical to justify the time and cost spent for translocation. The  
696 group suggested development of protocols and surveillances for hatchery establishment.  
697

## 4. Summary 698

699 Wildlife DRA as a decision-making tool is gaining recognition and DRA procedures and manuals have  
700 recently been published (6, 11). However, there is no standardised and unified method to perform a  
701 DRA (33). Workbooks, paired-ranking, expert workshops and scenario trees have been successfully  
702 used in previous analyses (6, 11, 29) and were therefore adapted in this study. The comprehensive  
703 explanation of each method is provided in the Jakob-Hoff *et al.* (11). The current study was an  
704 endeavour to update the information about health hazards of sea turtles in a structured way.  
705 Although, it is more practical to use a DRA for a specific scenario or case such as clutch translocation  
706 or hatchery establishment, this study provides up-to-date baseline information on a global scale and  
707 can serve as a guide to carry out such practices on a local scale.

708 Here, the hazard identification was more exhaustive than a standard review for DRA as it contains  
709 the collective information of disease causing hazards (Appendix 4-8). The health hazards were  
710 assessed via a literature-based review and with input from experts in the field (Section 3). One of the  
711 considerable uncertainties revealed in this process was the data deficiency in the link between the  
712 presence of pathogens and infectious diseases of sea turtles. Additionally, viruses were identified as  
713 the least studied pathogens, although FP is suggested to have a viral aetiology. A higher rate of  
714 disease in immunocompromised individuals was repeatedly reported and a possible link between  
715 immunosuppression and environmental contaminants as a result of anthropogenic influence was  
716 suggested. One Health aspects, including the social element of interacting with sea turtles and  
717 society-based conservation, appeared to need more attention and research.

718 In this study, the risk management section was achieved through a global review of the current  
719 policies, possible management options and the difficulties of taking actions and was reviewed by  
720 members of IUCN Species Survival Commission (SSC) Sea turtle Specialist Group who are influential  
721 in making the policies and executing them.

This DRA is mainly a guide to support future risk assessments/management based on specific risk mitigating questions for which the management section should be done with the input of regional policy makers. Such discussions were initiated with appropriate local Australian government representatives to clarify appropriate steps in risk management for specific scenarios. Conducting a DRA is an iterative process and risk analysis should continuously be reviewed and modified to represent the most recent information for policy and management decisions (33). Disease surveillance and data collection to determine the contributing factors in population health is a practical approach to create evidence-based risk management actions for wildlife; and sea turtles are no exception. While future DRAs can benefit from this comprehensive review, the baseline information will undoubtedly expand as more pathogens are discovered, disease manifestations are reported and diagnostic tools are introduced. The anthropogenic threats affecting sea turtles are increasing and so are the conservation initiatives to help these charismatic animals. Disease and health of sea turtles are not easily measured and management agencies are going to look for structured approaches to inform their decisions. The work presented here can form a platform for disease risk management of sea turtles, thereby aiding in their conservation.

## 5. Acknowledgement

The authors would like to thank Dr. Thierry Martin Work and Dr. Mark Flint for reviewing this manuscript and providing constructive comments and critical points.

## 6. References

1. IUCN. The IUCN Red List of Threatened Species 2018. Available from: <http://www.iucnredlist.org/>.
2. Troëng S, Rankin E. Long-term conservation efforts contribute to positive green turtle *Chelonia mydas* nesting trend at Tortuguero, Costa Rica. *Biological Conservation*. 2005;121(1):111-6.
3. Herbst LH, Jacobson ER. Practical approaches for studying sea turtle health and disease. In: Lutz L, Musick JA, editors. *The Biology of Sea Turtles*. 2. Florida, United States: CRC Press; 2002. p. 385-410.
4. Daszak P, Cunningham AA, Hyatt AD. Emerging infectious diseases of wildlife--threats to biodiversity and human health. *science*. 2000;287(5452):443-9.
5. Jensen MP. Assessing the composition of green turtle (*Chelonia mydas*) foraging grounds in Australasia using mixed stock analyses: University of Canberra; 2010.
6. Pacioni C, Eden P, Reiss A, Ellis T, Knowles G, Wayne AF. Disease hazard identification and assessment associated with wildlife population declines. *Ecological Management & Restoration*. 2015;16(2):142-52.
7. Alfaro A, Kjøie M, Buchmann K, editors. Synopsis of infections in sea turtles caused by virus, bacteria and parasites: an ecological review. 27th Annual Symposium on Sea Turtle Biology and Conservation; 2008: NOAA Tech Memo.
8. Manire C, M. Norton T, A. Stacy B, Innis C, Harms C. *Sea Turtle Health and Rehabilitation*: J.Ross Publishing; 2017.
9. Lewbart GA, Hirschfeld M, Denkinger J, Vasco K, Guevara N, Garcia J, et al. Blood Gases, Biochemistry, and Hematology of Galapagos Green Turtles (*Chelonia Mydas*): e96487. *PLoS ONE*. 2014;9(5).
10. Reséndiz E, Lara-Uc MM. Health Assessments in Free-Ranging Sea Turtles: Perspective of Animal Welfare in Wildlife. *Animal Welfare*. 2018:29.
11. Jakob-Hoff RM, MacDiarmid SC, Lees C, Miller PS, Travis D, Kock R. original: *Manual of Procedures for Wildlife Disease Risk Analysis*. Co-published by OIE and IUCN 2014.
12. Association AVM. *One health: A new professional imperative*. 2008.
13. Zinsstag J, Schelling E, Waltner-Toews D, Tanner M. From "one medicine" to "one health" and systemic approaches to health and well-being. *Preventive veterinary medicine*. 2011;101(3-4):148-56.
14. Zinsstag J, Schelling E, Waltner-Toews D, Whittaker M, Tanner M. *One Health: the theory and practice of integrated health approaches*. Oxfordshire, United Kingdom: CABI; 2015.
15. Keller JM, Kucklick JR, Stamper MA, Harms CA, McClellan-Green PD. Associations between Organochlorine Contaminant Concentrations and Clinical Health Parameters in Loggerhead Sea Turtles from North Carolina, USA. *Environmental Health Perspectives*. 2004;112(10):1074-9.
16. Webb SJ, Zychowski GV, Bauman SW, Higgins BM, Raudsepp T, Gollahon LS, et al. Establishment, Characterization, and Toxicological Application of Loggerhead Sea Turtle (*Caretta caretta*) Primary Skin Fibroblast Cell Cultures. *Environmental science & technology*. 2014;48(24):14728-37.
17. Musick J, Limpus C. Habitat utilization and migration in juvenile sea turtles. In: Lutz PL, Musick JA, editors. *The Biology of Sea Turtle*. 1. Florida, United States: CRC Press; 1997. p. 137-63.
18. Shimada T, Jones R, Limpus C, Groom R, Hamann M. Long-term and seasonal patterns of sea turtle home ranges in warm coastal foraging habitats: implications for conservation. *Marine Ecology Progress Series*. 2016;562:163-79.
19. Aguirre AA, Lutz P. Marine Turtles as Sentinels of Ecosystem Health: Is Fibropapillomatosis an Indicator? *EcoHealth*. 2004;1(3):275-83.

20. Smith KF, Sax DF, Lafferty KD. Evidence for the role of infectious disease in species extinction and endangerment. *Conservation Biology*. 2006;20(5):1349-57.
21. Jones AG. Sea turtles: Old viruses and new tricks. *Current Biology*. 2004;14(19):R842-R3.
22. Hamann M, Godfrey M, Seminoff J, Arthur K, Barata P, Bjorndal K, et al. Global research priorities for sea turtles: informing management and conservation in the 21st century. *Endangered species research*. 2010;11(3):245-69.
23. Fichi G, Cardeti G, Cersini A, Mancusi C, Guarducci M, Di Guardo G, et al. Bacterial and viral pathogens detected in sea turtles stranded along the coast of Tuscany, Italy. *Veterinary Microbiology*. 2016;185:56-61.
24. George RH. Health problems and diseases of sea turtles. In: Lutz PL, Musick JA, editors. *The Biology of Sea Turtle*. 1. Florida: CRC Press; 1997.
25. Flint M, Patterson-Kane JC, Limpus CJ, Mills PC. Health surveillance of stranded green turtles in Southern Queensland, Australia (2006–2009): an epidemiological analysis of causes of disease and mortality. *EcoHealth*. 2010;7(1):135-45.
26. Gilman E, Zollett E, Beverly S, Nakano H, Davis K, Shiode D, et al. Reducing sea turtle by-catch in pelagic longline fisheries. *Fish and Fisheries*. 2006;7(1):2-23.
27. Work PA, Sapp AL, Scott DW, Dodd MG. Influence of small vessel operation and propulsion system on loggerhead sea turtle injuries. *Journal of Experimental Marine Biology and Ecology*. 2010;393(1):168-75.
28. Crane O. *Marine Turtle Health Assessment and Aquarium Suitability: Uzi Island, Zanzibar*. 2013.
29. Armstrong D, Jakob-Hoff R, Seal US. *Animal Movements and Disease Risk - A Workbook*. 5 ed. Apple Valley, Minnesota: IUCN/SSC Conservation Breeding Specialist Group; 2003.
30. Stevenson MA, Firestone SM. Veterinary epidemiology and 'one health' in Australasia. *Australasian Epidemiologist*. 2015;22(1):35-8.
31. Balazs GH, Chaloupka M. Thirty-year recovery trend in the once depleted Hawaiian green sea turtle stock. *Biological Conservation*. 2004;117(5):491-8.
32. Valdivia A, Wolf S, Suckling K. Marine mammals and sea turtles listed under the US Endangered Species Act are recovering. *PloS one*. 2019;14(1).
33. Hartley M, Sainsbury A. Methods of disease risk analysis in wildlife translocations for conservation purposes. *EcoHealth*. 2017;14(1):16-29.
34. Wallace BP, DiMatteo AD, Hurley BJ, Finkbeiner EM, Bolten AB, Chaloupka MY, et al. Regional management units for marine turtles: a novel framework for prioritizing conservation and research across multiple scales. *Plos one*. 2010;5(12).
35. Ahasan MS, Picard J, Elliott L, Kinobe R, Owens L, Ariel E. Evidence of antibiotic resistance in Enterobacteriales isolated from green sea turtles, *Chelonia mydas* on the Great Barrier Reef. *Marine pollution bulletin*. 2017;120(1-2):18-27.
36. Committee EaCR. *Toxic tide: the threat of marine plastic pollution in Australia*. 2016 ISBN 978-1-76010-400-9
37. Duncan EM, Broderick AC, Fuller WJ, Galloway TS, Godfrey MH, Hamann M, et al. Microplastic ingestion ubiquitous in marine turtles. *Global change biology*. 2019;25(2):744-52.
38. Cunningham AA. Disease risks of wildlife translocations. *Conservation biology*. 1996;10(2):349-53.
39. Brückner G, MacDiarmid SC, Murray N, Berthe F, Müller-Graf C, Sugiura K, et al. *Handbook on Import Risk Analysis for Animal and Animal Products, Introduction and Qualitative Risk Analysis*. Paris, France: Handbook on Import Risk Analysis for Animal and Animal Products, Introduction and Qualitative Risk Analysis; 2010.
40. Heppell SS, Crowder LB, Crouse DT. Models to evaluate headstarting as a management tool for long-lived turtles. *Ecological applications*. 1996;6(2):556-65.

41. Glazebrook JS, Campbell RSF. A SURVEY OF THE DISEASES OF MARINE TURTLES IN NORTHERN AUSTRALIA .2. OCEANARIUM-REARED AND WILD TURTLES. DISEASES OF AQUATIC ORGANISMS. 1990;9(2):97-104.
42. Campbell RS, Glazebrook JS. A survey of the diseases of marine turtles in northern Australia I : farmed turtles. 1990.
43. Raidal SR, Ohara M, Hobbs RP, Prince RIT. Gram-negative bacterial infections and cardiovascular parasitism in green sea turtles (*Chelonia mydas*). Australian Veterinary Journal. 1998;76(6):415-7.
44. Zavala-Norzagaray AA, Aguirre AA, Velazquez-Roman J, Flores-Villaseñor H, León-Sicairos N, Ley-Quiñonez CP, et al. Isolation, characterization, and antibiotic resistance of *Vibrio* spp. in sea turtles from Northwestern Mexico. Frontiers in Microbiology. 2015;6:635.
45. Orós J, Torrent A, Calabuig P, Déniz S. Diseases and causes of mortality among sea turtles stranded in the Canary Islands, Spain (1998–2001). Diseases of aquatic organisms. 2005;63(1):13-24.
46. Phillott AD, Parmenter CJ. The distribution of failed eggs and the appearance of fungi in artificial nests of green (*Chelonia mydas*) and loggerhead (*Caretta caretta*) sea turtles. Australian Journal of Zoology. 2001;49(6):713-8.
47. Williams SR, Sims MA, Roth-Johnson L, Wickes B. Surgical removal of an abscess associated with *Fusarium solani* from a Kemp's ridley sea turtle (*Lepidochelys kempii*). Journal of Zoo and Wildlife Medicine. 2012;43(2):402-6.
48. Sarmiento-Ramírez JM, Abella-Pérez E, Phillott AD, Sim J, van West P, Martín MP, et al. Global Distribution of Two Fungal Pathogens Threatening Endangered Sea Turtles. PLoS ONE. 2014;9(1):e85853.
49. Short DPG, O'Donnell K, Zhang N, Juba JH, Geiser DM. Widespread Occurrence of Diverse Human Pathogenic Types of the Fungus *Fusarium* Detected in Plumbing Drains. Journal of Clinical Microbiology. 2011;49(12):4264-72.
50. Phillott AD, Parmenter CJ, Limpus CJ. Occurrence of mycobiota in eastern Australian sea turtle nests. Memoirs of the Queensland Museum. 2004;49:701-3.
51. Phillott AD, Parmenter CJ. Fungal colonization of green sea turtle (*Chelonia mydas*) nests is unlikely to affect hatchling condition. Herpetological Conservation and Biology. 2014;9(2):297-301.
52. Donnelly K, Waltzek TB, Wellehan Jr JF, Sutton DA, Wiederhold NP, Stacy BA. Phaeohyphomycosis resulting in obstructive tracheitis in three green sea turtles *Chelonia mydas* stranded along the Florida coast. Diseases of aquatic organisms. 2015;113(3):257-62.
53. Greiner EC. Parasites of Marine Turtles. In: Wyneken J, Lohmann KJ, Musick JA, editors. The Biology of Sea Turtles. 3. Hoboken: Taylor and Francis; 2013.
54. Santoro M, Mattiucci S. Sea Turtle Parasites. In: Wehrmann IS, Cortés J, editors. Marine Biodiversity of Costa Rica, Central America. Dordrecht: Springer Netherlands; 2009. p. 507-19.
55. Santoro M, Greiner EC, Morales JA, Rodriguez-Ortiz B. Digenetic trematode community in nesting green sea turtles (*Chelonia mydas*) from Tortuguero National Park, Costa Rica. J Parasitol. 2006;92(6):1202-6.
56. Cribb TH, Crespo-Picazo JL, Cutmore SC, Stacy BA, Chapman PA, García-Párraga D. Elucidation of the first definitively identified life cycle for a marine turtle blood fluke (Trematoda: Spirorchiidae) enables informed control. International Journal for Parasitology. 2017;47(1):61-7.
57. Lester R, Blair D, Heald D. Nematodes from scallops and turtles from Shark Bay, Western Australia. Marine and Freshwater Research. 1980;31(5):713-7.
58. Flint M. Free-Ranging Sea Turtle Health. In: Wyneken J, Lohmann KJ, Musick JA, editors. The Biology of Sea Turtles. 3. Hoboken: Taylor and Francis; 2013.
59. Chapman PA, Owen H, Flint M, Traub RJ, Cribb TH, Mills PC. Molecular Characterization of *Coccidia* Associated with an Epizootic in Green Sea Turtles (*Chelonia mydas*) in South East Queensland, Australia. PLoS ONE. 2016;11(2):e0149962.
60. Marschang RE. Viruses infecting reptiles. Viruses. 2011;3(11):2087-126.
61. Ariel E. Viruses in reptiles. Vet Res. 2011;42:100.

62. Manire CA, Stacy BA, Kinsel MJ, Daniel HT, Anderson ET, Wellehan JF. Proliferative dermatitis in a loggerhead turtle, *Caretta caretta*, and a green turtle, *Chelonia mydas*, associated with novel papillomaviruses. *Veterinary microbiology*. 2008;130(3):227-37.
63. Ng TFF, Manire C, Borrowman K, Langer T, Ehrhart L, Breitbart M. Discovery of a Novel Single-Stranded DNA Virus from a Sea Turtle Fibropapilloma by Using Viral Metagenomics. *Journal of Virology*. 2009;83(6):2500-9.
64. Casey RN, Quackenbush SL, Work TM, Balazs GH, Bowser PR, Casey JW. Evidence for retrovirus infections in green turtles *Chelonia mydas* from the Hawaiian islands. *Diseases of Aquatic Organisms*. 1997;31(1):1-7.
65. Mashkour N, Maclaine A, Burgess GW, Ariel E. Discovery of an Australian *Chelonia mydas* papillomavirus via green turtle primary cell culture and qPCR. *J Virol Methods*. 2018.
66. Kirchgessner M, Mitchell MA. CHAPTER 9 - CHELONIANS. In: Tully MAMN, editor. *Manual of Exotic Pet Practice*. Saint Louis: W.B. Saunders; 2009. p. 207-49.
67. Lackovich JK, Brown DR, Homer BL, Garber RL, Mader DR, Moretti RH, et al. Association of herpesvirus with fibropapillomatosis of the green turtle *Chelonia mydas* and the loggerhead turtle *Caretta caretta* in Florida. *Diseases of aquatic organisms*. 1999;37(2):89-97.
68. Herbst L, Jacobson E, Klein P, Balazs G, Moretti R, Brown T, et al. Comparative pathology and pathogenesis of spontaneous and experimentally induced fibropapillomas of green turtles (*Chelonia mydas*). *Veterinary Pathology Online*. 1999;36(6):551-64.
69. de Deus Santos MR, Martins AS, Baptistotte C, Work TM. Health condition of juvenile *Chelonia mydas* related to fibropapillomatosis in southeast Brazil. *Diseases of aquatic organisms*. 2015;115:193-201.
70. Haines H. A herpesvirus disease of green sea turtles in aquaculture. *Marine Fisheries Review*. 1978:33-7.
71. Klein PA, Jacobson E. Further strategies for evaluating the etiological role of a tumor-associated herpesvirus in marine turtle fibropapillomatosis. University of Florida, Gainesville: Florida Cooperative Fish and Wildlife Research Unit; 2001.
72. Coberley SS, Condit RC, Herbst LH, Klein PA. Identification and expression of immunogenic proteins of a disease-associated marine turtle herpesvirus. *Journal of virology*. 2002;76(20):10553-8.
73. Marschang R, Divers S. Reptile viruses. In: Mader DR, Divers SJ, editors. *Current Therapy in Reptile Medicine and Surgery*, ed DR Mader and SJ Divers: W.B. Saunders; 2014. p. 368-81.
74. Quackenbush SL, Work TM, Balazs GH, Casey RN, Rovnak J, Chaves A, et al. Three closely related herpesviruses are associated with fibropapillomatosis in marine turtles. *Virology*. 1998;246(2):392-9.
75. Work TM, Balazs GH, Rameyer RA, Morris RA. Retrospective pathology survey of green turtles *Chelonia mydas* with fibropapillomatosis in the Hawaiian Islands, 1993-2003. *Diseases of aquatic organisms*. 2004;62(1):163-76.
76. Chaloupka M, Work TM, Balazs GH, Murakawa SK, Morris R. Cause-specific temporal and spatial trends in green sea turtle strandings in the Hawaiian Archipelago (1982–2003). *Marine Biology*. 2008;154(5):887-98.
77. Jones K, Ariel E, Burgess G, Read M. A review of fibropapillomatosis in Green turtles (*Chelonia mydas*). *The Veterinary Journal*. 2016;212:48-57.
78. Curry SS, Brown DR, Gaskin JM, Jacobson ER, Ehrhart LM, Blahak S, et al. Persistent infectivity of a disease-associated herpesvirus in green turtles after exposure to seawater. *Journal of Wildlife Diseases*. 2000;36(4):792-7.
79. Van Houtan KS, Hargrove SK, Balazs GH. Land use, macroalgae, and a tumor-forming disease in marine turtles. *PLoS One*. 2010;5(9).
80. Smith G, Coates C. Fibro-epithelial growths of the skin in large marine turtles, *Chelonia mydas* (Linnaeus). *Zoologica*. 1938;23:93-8.



81. Cárdenas DM, Cucalón RV, Medina-Magües LG, Jones K, Alemán RA, Alfaro-Núñez A, et al. Fibropapillomatosis in a Green Sea Turtle (*Chelonia mydas*) from the Southeastern Pacific. *Journal of wildlife diseases*. 2019;55(1):169-73.
82. Kumar V, Palaniappan PM, Loganathan AL, editors. First reported case of fibropapillomatosis in green turtles (*Chelonia mydas*) in Sabah, Borneo. 38th Annual Symposium on Sea Turtle Biology and Conservation; 2018; Kobe, Japan.
83. Villanueva JAE, Raygosa JB, Campos EH, Oshima S, Lara-Uc M, Reséndiz E, et al., editors. Detection of Chelonid herpesvirus 5 (ChHV5) in sea turtles from feeding areas of Baja California Peninsula, Mexico. 38th Annual Symposium on Sea Turtle Biology and Conservation 2018; Kobe, Japan.
84. Jacobson ER, Homer BL, Stacy BA, Greiner EC, Szabo NJ, Chrisman CL, et al. Neurological disease in wild loggerhead sea turtles *Caretta caretta*. *Dis Aquat Organ*. 2006;70(1-2):139-54.
85. Smith KF, Acevedo-Whitehouse K, Pedersen AB. The role of infectious diseases in biological conservation. *Animal conservation*. 2009;12(1):1-12.
86. Ward JR, Lafferty KD. The Elusive Baseline of Marine Disease: Are Diseases in Ocean Ecosystems Increasing? *PLoS Biol*. 2004;2(4):e120.
87. Dobbs K. Marine turtles in the Great Barrier Reef World Heritage Area: a compendium of information and basis for the development of policies and strategies for the conservation of marine turtles: Great Barrier Reef Marine Park Authority; 2001.
88. Hamann M, Fuentes M, Ban NC, Mocellin V. Climate change and marine turtles. In: Wyneken J, Lohmann KJ, Musick JA, editors. *The biology of sea turtles*. 3. Hoboken, NJ: Taylor and Francis; 2013. p. 353.
89. Casale P, Affronte M, Insacco G, Freggi D, Vallini C, Pino d'Astore P, et al. Sea turtle strandings reveal high anthropogenic mortality in Italian waters. *Aquatic Conservation: Marine and Freshwater Ecosystems*. 2010;20(6):611-20.
90. Cosgrove MJ, Roe SA. *Turtles: anatomy, ecology, and conservation*. Hauppauge, N.Y: Nova Science Publishers; 2012.
91. Limpus CJ, Fien L. *A biological review of Australian marine turtles*. Brisbane, Australia: Environmental Protection Agency; 2009.
92. García-Párraga D, Crespo-Picazo J, de Quirós YB, Cervera V, Martí-Bonmati L, Díaz-Delgado J, et al. Decompression sickness ('the bends') in sea turtles. *Diseases of aquatic organisms*. 2014;111(3):191-205.
93. Stacy NI, Lynch JM, Arendt MD, Avens L, McNeill JB, Cray C, et al. Chronic debilitation in stranded loggerhead sea turtles (*Caretta caretta*) in the southeastern United States: Morphometrics and clinicopathological findings. *PloS one*. 2018;13(7).
94. Norton TM. *Debilitated Sea Turtle Clinical Management*. WIDECAST Technical Report No. 16: 2014.
95. Davenport J. Temperature and the life-history strategies of sea turtles. *Journal of thermal biology*. 1997;22(6):479-88.
96. Shaver DJ, Tissot PE, Streich MM, Walker JS, Rubio C, Amos AF, et al. Hypothermic stunning of green sea turtles in a western Gulf of Mexico foraging habitat. *PLOS ONE*. 2017;12(3):e0173920.
97. Carr A. Impact of nondegradable marine debris on the ecology and survival outlook of sea turtles. *Marine Pollution Bulletin*. 1987;18(6):352-6.
98. Camedda A, Marra S, Matiddi M, Massaro G, Coppa S, Perilli A, et al. Interaction between loggerhead sea turtles (*Caretta caretta*) and marine litter in Sardinia (Western Mediterranean Sea). *Marine environmental research*. 2014;100:25-32.
99. Hawkes LA, Broderick AC, Godfrey MH, Godley BJ. Climate change and marine turtles. *Endangered Species Research*. 2009;7(2):137-54.
100. Deem SL, Norton TM, Mitchell M, Segars A, Alleman AR, Cray C, et al. Comparison of blood values in foraging, nesting, and stranded loggerhead turtles (*Caretta caretta*) along the coast of Georgia, USA. *Journal of Wildlife Diseases*. 2009;45(1):41-56.

101. Fauquier DA, Flewelling LJ, Maucher J, Manire CA, Socha V, Kinsel MJ, et al. Brevetoxin in blood, biological fluids, and tissues of sea turtles naturally exposed to *Karenia brevis* blooms in central west Florida. *Journal of Zoo and Wildlife Medicine*. 2013;44(2):364-75.
102. Brodie J, Ariel E, Thomas C, O'Brien D, Berry K. Links between water quality and marine turtle health. *TropWATER - Tropical Water & Aquatic Ecosystem Research*: 2014.
103. Orós J, Montesdeoca N, Camacho M, Arencibia A, Calabuig P. Causes of Stranding and Mortality, and Final Disposition of Loggerhead Sea Turtles (*Caretta caretta*) Admitted to a Wildlife Rehabilitation Center in Gran Canaria Island, Spain (1998-2014): A Long-Term Retrospective Study. *PLoS ONE*. 2016;11(2):e0149398.
104. Torrent A, Deniz S, Ruiz A, Calabuig P, Sicilia J, Oros J. Esophageal diverticulum associated with *Aerococcus viridans* infection in a loggerhead sea turtle (*Caretta caretta*). *J Wildl Dis*. 2002;38(1):221-3.
105. Stahelin GD, Hennemann MC, Cegoni CT, Wanderlinde J, e Lima EP, Goldberg DW. Case Report: Ingestion of a Massive Amount of Debris by a Green Turtle (*Chelonia mydas*) in Southern Brazil. *Marine Turtle Newsletter*. 2012;117(135):3-5.
106. Stamper MA, Spicer CW, Neiffer DL, Mathews KS, Fleming GJ. Morbidity in a Juvenile Green Sea Turtle (*Chelonia mydas*) Due to Ocean-Borne Plastic. *Journal of Zoo and Wildlife Medicine*. 2009;40(1):196-8.
107. Wallace BP, DiMatteo AD, Bolten AB, Chaloupka MY, Hutchinson BJ, Abreu-Grobois FA, et al. Global conservation priorities for marine turtles. 2011.
108. Warwick C, Arena PC, Steedman C. Health implications associated with exposure to farmed and wild sea turtles. *JRSM Short Reports*. 2013;4(1):8.
109. Swingland IR, Coe M. The natural regulation of Giant tortoise populations on Aldabra Atoll. *Reproduction*. *Journal of Zoology*. 1978;186(3):285-309.
110. Ranaivoson G, de Ribes Champetier G, Mamy E, Jeannerod G, Razafinjato P, Chanteau S. Mass food poisoning after eating sea turtle in the Antalaha district. *Archives de l'Institut Pasteur de Madagascar*. 1994;61(2):84-6.
111. Pavlin BI, Musto J, Pretrick M, Sarofalpiy J, Sappa P, Shapucy S, et al. Mass poisoning after consumption of a hawksbill turtle, Federated States of Micronesia, 2010. *Western Pacific surveillance and response journal: WPSAR*. 2015;6(1):25.
112. Ventura RJ, Ching PK, de los Reyes VC, Sucaldito MN, Tayag E. Chelonitoxism outbreak caused from consuming turtle, Eastern Samar, Philippines, August 2013. *Western Pacific surveillance and response journal: WPSAR*. 2015;6(2):12.
113. Oros J, Arencibia A, Fernandez L, Jensen HE. Intestinal candidiasis in a loggerhead sea turtle (*Caretta caretta*): an immunohistochemical study. *Vet J*. 2004;167(2):202-7.
114. Buller NB. *Bacteria and Fungi from Fish and other Aquatic Animals: a practical identification manual*: Cabi; 2014.
115. Tisdell C, Wilson C. Ecotourism for the survival of sea turtles and other wildlife. *Biodiversity & Conservation*. 2002;11(9):1521-38.
116. Campbell LM. *Studying Sea Turtle Conservations and Learning about the World*. *Conservation and Society*. 2010;8(1):1-4.
117. Senko J, Schneller AJ, Solis J, Ollervides F, Nichols WJ. People helping turtles, turtles helping people: understanding resident attitudes towards sea turtle conservation and opportunities for enhanced community participation in Bahia Magdalena, Mexico. *Ocean & coastal management*. 2011;54(2):148-57.
118. Authorities) GGBRMP. *Traditional Use of Marine Resources Agreements*. 2018.
119. Barrios-Garrido H, Wildermann N, Diedrich A, Hamann M. Conflicts and solutions related to marine turtle conservation initiatives in the Caribbean basin: Identifying new challenges. *Ocean & coastal management*. 2019;171:19-27.
120. Government Q. *Environment, land and water: Plastic bag ban*. 2018.

121. Aguirre AA. Occurrence of potential pathogens in green sea turtles (*Chelonia mydas*) afflicted or free of fibropapillomas in Kaneohe Bay, Island of Oahu, Hawaii, 1991. United States: University of California Libraries; 1992.
122. Aguirre AA, Balazs GH, Zimmerman B, Spraker TR. Evaluation of Hawaiian green turtles (*Chelonia mydas*) for potential pathogens associated with fibropapillomas. *Journal of Wildlife Diseases*. 1994;30(1):8-15.
123. Glazebrook J, Campbell R, Thomas A. Studies on an ulcerative stomatitis, obstructive rhinitis pneumonia disease complex in hatchling and juvenile sea turtles *Chelonia mydas* and *Caretta caretta*. *Diseases of Aquatic Organisms*. 1993;16(2):133-47.
124. Orós J, Camacho M, Calabuig P, Arencibia A. Salt gland adenitis as only cause of stranding of loggerhead sea turtles *Caretta caretta*. *Diseases of aquatic organisms*. 2011;95(2):163-6.
125. Work TM, Balazs GH, Wolcott M, Morris R. Bacteraemia in free-ranging Hawaiian green turtles *Chelonia mydas* with fibropapillomatosis. *Diseases of aquatic organisms*. 2003;53(1):41-6.
126. Awong-Taylor J, Craven KS, Griffiths L, Bass C, Muscarella M. Comparison of biochemical and molecular methods for the identification of bacterial isolates associated with failed loggerhead sea turtle eggs. *J Appl Microbiol*. 2008;104(5):1244-51.
127. Chuen-Im T, Areekijseree M, Chongthammakun S, Graham SV. Aerobic Bacterial Infections in Captive Juvenile Green Turtles (*Chelonia mydas*) and Hawksbill Turtles (*Eretmochelys imbricata*) from Thailand. *Chelonian Conservation and Biology*. 2010;9(1):135-42.
128. Chinnadurai SK, Devoe RS. Selected infectious diseases of reptiles. *Vet Clin North Am Exot Anim Pract*. 2009;12(3):583-96, Table of Contents.
129. Foti M, Bottari T, Coci G, Daidone A, Maria Grazia Pennisi. Enterobacteriaceae Isolates in Cloacal Swabs from Live-stranded Internally-hooked Loggerhead Sea Turtles, *Caretta caretta*, in the Central Mediterranean Sea. *Journal of Herpetological Medicine and Surgery*. 2008;17(4).
130. Foti M, Giacobello C, Bottari T, Fisichella V, Rinaldo D, Mammina C. Antibiotic Resistance of Gram Negatives isolates from loggerhead sea turtles (*Caretta caretta*) in the central Mediterranean Sea. *Mar Pollut Bull*. 2009;58(9):1363-6.
131. Keene E, Soule T, Paladino F. Microbial Isolations from Olive Ridley (*Lepidochelys olivacea*) and East Pacific Green (*Chelonia mydas agassizii*) Sea Turtle Nests in Pacific Costa Rica, and Testing of Cloacal Fluid Antimicrobial Properties. *Chelonian Conservation and Biology*. 2014;13(1):49-55.
132. Zieger U, Trelease H, Winkler N, Mathew V, Sharma RN. Bacterial Contamination of Leatherback Turtle (*Dermochelys coriacea*) eggs and sand in nesting chambers at Levera Beach, Grenada, West Indies-a preliminary study. *West indian veterinary journal*. 2009;9(2):21-6.
133. Al-Bahry SN, Al-Zadjali MA, Mahmoud IY, Elshafie AE. Biomonitoring marine habitats in reference to antibiotic resistant bacteria and ampicillin resistance determinants from oviductal fluid of the nesting green sea turtle, *Chelonia mydas*. *Chemosphere*. 2012;87(11):1308-15.
134. Wyneken J, Burke TJ, Salmon M, Pedersen DK. Egg Failure in Natural and Relocated Sea Turtle Nests. *Journal of Herpetology*. 1988;22(1):88-96.
135. Santoro M, Hernández G, Caballero M, García F. AEROBIC BACTERIAL FLORA OF NESTING GREEN TURTLES (*CHELONIA MYDAS*) FROM TORTUGUERO NATIONAL PARK, COSTA RICA. *Journal of Zoo and Wildlife Medicine*. 2006;37(4):549-52.
136. Aguirre AA, Gardner SC, Marsh JC, Delgado SG, Limpus CJ, Nichols WJ. Hazards Associated with the Consumption of Sea Turtle Meat and Eggs: A Review for Health Care Workers and the General Public. *EcoHealth*. 2006;3(3):141-53.
137. Oros J, Calabuig P, Deniz S. Digestive pathology of sea turtles stranded in the Canary Islands between 1993 and 2001. *Vet Rec*. 2004;155(6):169-74.
138. Obendorf D, Carson J, McManus T. *Vibrio damsela* infection in a stranded leatherback turtle (*Dermochelys coriacea*). *Journal of wildlife diseases*. 1987;23(4):666-8.
139. O'Grady KA, Krause V. An outbreak of salmonellosis linked to a marine turtle. *Southeast Asian J Trop Med Public Health*. 1999;30(2):324-7.

140. Dutton CS, Revan F, Wang C, Xu C, Norton TM, Stewart KM, et al. SALMONELLA ENTERICA PREVALENCE IN LEATHERBACK SEA TURTLES (*DERMOCHELYS CORIACEA*) IN ST. KITTS, WEST INDIES. *Journal of Zoo and Wildlife Medicine*. 2013;44(3):765-8.
141. Work TM, Dagenais J, Stacy BA, Ladner JT, Lorch JM, Balazs GH, et al. A novel host-adapted strain of *Salmonella* Typhimurium causes renal disease in olive ridley turtles (*Lepidochelys olivacea*) in the Pacific. *Scientific reports*. 2019;9(1):1-13.
142. Oros J, Calabuig P, Arencibia A, Camacho M, Jensen H. Systemic mycosis caused by *Trichophyton* spp. in an olive ridley sea turtle (*Lepidochelys olivacea*): an immunohistochemical study. *N Z Vet J*. 2011;59(2):92-5.
143. Lu HK, Chen EF, Xie SY, Chai CL, Wei YD, Mo ST, et al. [Investigation on vibrio cholera carried in aquatic products of littoral areas, Zhejiang Province]. *Zhonghua Yu Fang Yi Xue Za Zhi*. 2006;40(5):336-8.
144. Acuña MT, Díaz G, Bolaños H, Barquero C, Sánchez O, Sánchez LM, et al. Sources of *Vibrio mimicus* Contamination of Turtle Eggs. *Applied and Environmental Microbiology*. 1999;65(1):336-8.
145. Guthrie A, George J, deMaar TW. Bilateral Chronic Shoulder Infections in an Adult Green Sea Turtle (*Chelonia mydas*). *Journal of Herpetological Medicine and Surgery*. 2010;20(4):105-8.
146. Innis CJ, Braverman H, Cavin JM, Ceresia ML, Baden LR, Kuhn DM, et al. Diagnosis and management of *Enterococcus* spp infections during rehabilitation of cold-stunned Kemp's ridley turtles (*Lepidochelys kempii*): 50 cases (2006–2012). *Journal of the American Veterinary Medical Association*. 2014;245(3):315-23.
147. Keene EL. Microorganisms from sand, cloacal fluid, and eggs of *Lepidochelys olivacea* and standard testing of cloacal fluid antimicrobial properties. department of biology: Indiana University-Purdue University Fort Wayne; 2012.
148. Homer BL, Jacobson ER, Schumacher J, Scherba G. Chlamydiosis in Mariculture-reared Green Sea Turtles (*Chelonia mydas*). *Vet Pathol*. 1994;31(1).
149. Arena PC, Warwick C, Steedman C. Welfare and Environmental Implications of Farmed Sea Turtles. *Journal of Agricultural and Environmental Ethics*. 2014;27(2):309-30.
150. Brock JA, Nakamura RM, Miyahara AY, Chang EML. Tuberculosis in Pacific Green Sea Turtles, *Chelonia mydas*. *Transactions of the American Fisheries Society*. 1976;105(4):564-6.
151. Greer LL, Strandberg JD, Whitaker BR. *Mycobacterium chelonae* osteoarthritis in a Kemp's ridley sea turtle (*Lepidochelys kempii*). *J Wildl Dis*. 2003;39(3):736-41.
152. Nardini G, Florio D, Girolamo ND, Gustinelli A, Quaglio F, Fiorentini L, et al. DISSEMINATED MYCOBACTERIOSIS IN A STRANDED LOGGERHEAD SEA TURTLE (*CARETTA CARETTA*). *Journal of Zoo and Wildlife Medicine*. 2014;45(2):357-60.
153. Donnelly K, Waltzek TB, Wellehan JF, Jr., Stacy NI, Chadam M, Stacy BA. *Mycobacterium haemophilum* infection in a juvenile leatherback sea turtle (*Dermochelys coriacea*). *J Vet Diagn Invest*. 2016;28(6):718-21.
154. Leong JK, Smith DL, Revera DB, Lewis DH, Scott JL, DiNuzzo AR, editors. Health care and diseases of captive-reared loggerhead and Kemp's ridley sea turtles. *Proceedings of the First International Symposium on Kemp's Ridley Sea Turtle Biology, Conservation and Management*; 1989; Texas A&M University, Sea Grant College Program, College Station, TX.
155. Phillott AD, Parmenter CJ, Limpus CJ, Harrower K. Mycobiota as acute and chronic cloacal contaminants of female sea turtles. *Australian journal of zoology*. 2002;50(6):687-95.
156. Rédou V, Navarri M, Meslet-Cladière L, Barbier G, Burgaud G. Species Richness and Adaptation of Marine Fungi from Deep-Subseafloor Sediments. *Applied and Environmental Microbiology*. 2015;81(10):3571-83.
157. Mo CL, Salas I, M C, editors. Are fungi and bacteria responsible for olive ridley's egg lost? *Tenth Annual Workshop on Sea Turtle Biology and Conservation*; 1990; Hilton Head Island, South Carolina: NOAA Technical Memorandum NMFS-SEFC-278.

158. Domiciano IG, Domit C, Trigo CC, de Alcântara BK, Headley SA, Bracarense APF. Phaeohyphomycoses in a Free-Ranging Loggerhead Turtle (*Caretta caretta*) from Southern Brazil. *Mycopathologia*. 2014;178(1-2):123-8.
159. Phillott AD, Elsmore S. Black noddies (*Anous minutus*) and wedge-tailed shearwaters (*Puffinus pacificus*) as potential hosts for fungi invading sea turtle nests at Heron Island, Queensland. *Transactions of the Royal Society of South Australia*. 2004;128:73-.
160. Güçlü Ö, Bıyık H, Şahiner A. Mycoflora identified from loggerhead turtle (*Caretta caretta*) egg shells and nest sand at Fethiye beach, Turkey. *African Journal of Microbiology Research*. 2010;4(5):408-13.
161. Smith KA. Nitrous oxide and climate change: Earthscan; 2010.
162. Woo PCY, Leung S-Y, Ngan AHY, Lau SKP, Yuen K-Y. A significant number of reported *Absidia corymbifera* (*Lichtheimia corymbifera*) infections are caused by *Lichtheimia ramosa* (syn. *Lichtheimia hongkongensis*): an emerging cause of mucormycosis. *Emerg Microbes Infect*. 2012;1:e15.
163. Jacobson E, Gaskin J, Shields R, White F. Mycotic pneumonia in mariculture-reared green sea turtles. *Journal of the American Veterinary Medical Association*. 1979;175(9):929-33.
164. Manire CA, Rhinehart HL, Sutton DA, Thompson EH, Rinaldi MG, Buck JD, et al. Disseminated mycotic infection caused by *Colletotrichum acutatum* in a Kemp's ridley sea turtle (*Lepidochelys kemp*). *Journal of clinical microbiology*. 2002;40(11):4273-80.
165. Allender MC, Dreslik M, Wylie S, Phillips C, Wylie DB, Maddox C, et al. *Chrysosporium* sp. Infection in Eastern Massasauga Rattlesnakes. *Emerging Infectious Diseases*. 2011;17(12):2383-4.
166. Sison T, Padilla M, Vizmanos M, Follosco M. Isolation and identification of fungi found in necrotic skin lesions of captive marine turtles (*Eretmochelys imbricata*). *Philippine Journal of Veterinary Medicine*. 1990;27(2):35-6.
167. Oros J, Delgado C, Fernandez L, Jensen HE. Pulmonary hyalohyphomycosis caused by *Fusarium* spp in a Kemp's ridley sea turtle (*Lepidochelys kemp*): an immunohistochemical study. *N Z Vet J*. 2004;52(3):150-2.
168. Cabanes F, Alonso J, Castella G, Alegre F, Domingo M, Pont S. Cutaneous hyalohyphomycosis caused by *Fusarium solani* in a loggerhead sea turtle (*Caretta caretta* L.). *Journal of clinical microbiology*. 1997;35(12):3343-5.
169. Sarmiento-Ramírez JM, Abella E, Martín MP, Tellería MT, López-Jurado LF, Marco A, et al. *Fusarium solani* is responsible for mass mortalities in nests of loggerhead sea turtle, *Caretta caretta*, in Boavista, Cape Verde. *FEMS Microbiology Letters*. 2010;312(2):192-200.
170. Posthaus H, Krampe M, Pagan O, Gueho E, Suter C, Bacciarini L. Systemic paecilomycosis in a hawksbill turtle (*Eretmochelys imbricata*). *Journal de mycologie médicale*. 1997;7(4):223-6.
171. Schumacher VL, Mangold B, Lenzycki J, Hinckley L, Sutton DA, Frasca S. Occurrence of fruiting structures allows determination of *Purpureocillium lilacinum* as an inciting agent of pleuritis and pneumonia in a loggerhead sea turtle (*Caretta caretta*) by histopathologic correlation to culture. *Medical Mycology Case Reports*. 2014;6:42-5.
172. Bailey T. Mortality at a Hawksbill turtle (*Eretmochelys Imbricata*) rearing center. *Wildlife Middle East News* 2008.
173. Gordon AN. A necropsy-based study of green turtles (*Chelonia mydas*) in South-East Queensland. 2005.
174. Graczyk TK, Balazs GH, Work T, Aguirre AA, Ellis DM, Murakawa S, et al. *Cryptosporidium* sp. Infections in Green Turtles, *Chelonia mydas*, as a Potential Source of Marine Waterborne Oocysts in the Hawaiian Islands. *Applied and Environmental Microbiology*. 1997;63(7):2925-7.
175. Upton SJ, Odell DK, Walsh MT. *Eimeria caretta* sp. nov. (Apicomplexa: Eimeriidae) from the loggerhead sea turtle, *Caretta caretta* (Testudines). *Canadian journal of zoology*. 1990;68(6):1268-9.
176. Santoro M, Mattiucci S, Paoletti M, Liotta A, Degli Uberti B, Galiero G, et al. Molecular identification and pathology of *Anisakis pegreffii* (Nematoda: Anisakidae) infection in the Mediterranean loggerhead sea turtle (*Caretta caretta*). *Veterinary parasitology*. 2010;174(1):65-71.

177. WERNECK MR, THOMAZINI CM, MORI ES, GONÇALVES VT, GOMES BM. Gastrointestinal helminth parasites of Loggerhead turtle *Caretta caretta* Linnaeus 1758 (Testudines, Cheloniidae) in Brazil. *Pan-American Journal of Aquatic Sciences*. 2008;3(3):351-4.
178. Aznar FJ, Badillo FJ, Raga JA. Gastrointestinal Helminths of Loggerhead Turtles (*Caretta caretta*) from the Western Mediterranean: Constraints on Community Structure. *The Journal of Parasitology*. 1998;84(3):474-9.
179. Gracan R, Buršić M, Mladineo I, Kucinic M, Lazar B, Lackovic G. Gastrointestinal helminth community of loggerhead sea turtle *Caretta caretta* in the Adriatic Sea. *Diseases of aquatic organisms*. 2012;99(3):227.
180. Werneck M, Lima E, Pires T, Silva R. Helminth Parasites of the Juvenile Hawksbill Turtle *Eretmochelys imbricata* (Testudines: Cheloniidae) in Brazil. *The Journal of parasitology*. 2015;101(4):500-3.
181. Valente AL, Parga ML, Espada Y, Lavin S, Alegre F, Marco I, et al. Evaluation of Doppler ultrasonography for the measurement of blood flow in young loggerhead sea turtles (*Caretta caretta*). *The Veterinary Journal*. 2008;176(3):385-92.
182. Santoro M, Badillo FJ, Mattiucci S, Nascetti G, Bentivegna F, Insacco G, et al. Helminth communities of loggerhead turtles (*Caretta caretta*) from Central and Western Mediterranean Sea: The importance of host's ontogeny. *Parasitology International*. 2010;59(3):367-75.
183. Gomes M, Martins I, Werneck M, Pavanelli L. Community ecology of gastrointestinal helminths from green turtles (*Chelonia mydas*) collected in the coast of Espírito Santo. *Arquivo Brasileiro de Medicina Veterinária e Zootecnia*. 2017;69(3):644-50.
184. Wolke RE, Brooks DR, George A. SPIRORCHIDIASIS IN LOGGERHEAD SEA TURTLES (*CARETTA CARETTA*): PATHOLOGY. *Journal of Wildlife Diseases*. 1982;18(2):175-85.
185. Flint M, Eden PA, Limpus CJ, Owen H, Gaus C, Mills PC. Clinical and Pathological Findings in Green Turtles (*Chelonia mydas*) from Gladstone, Queensland: Investigations of a Stranding Epidemic. *EcoHealth*. 2015;12(2):298-309.
186. Graczyk TK, Aguirre AA, Balazs GH. Detection by ELISA of Circulating Anti-Blood Fluke (*Caretta*, *Haplotrema*, and *Learedius*) Immunoglobulins in Hawaiian Green Turtles (*Chelonia mydas*). *The Journal of Parasitology*. 1995;81(3):416-21.
187. Chen H, Kuo R, Chang T, Hus C, Bray R, Cheng I. Fluke (*Spirorchidae*) infections in sea turtles stranded on Taiwan: prevalence and pathology. *Journal of Parasitology*. 2012;98(2):437-9.
188. Werneck M, Nunes C, Jerdy H, Carvalho E. Loggerhead turtle, *Caretta caretta* (Linnaeus, 1758)(Testudines, Cheloniidae), as a new host of *Monticellius indicum* Mehra, 1939 (Digenea: Spirorchidae) and associated lesion to spirorchiid eggs. *Helminthologia*. 2017;54(4):363-8.
189. Blair D. A Revision of the Subfamily Octangiinae (Platyhelminthes, Digenea, Microsaphidiidae) Parasitic in Marine Turtles (Reptilia, Chelonia). *Australian journal of zoology*. 1987;35(1):75-92.
190. Werneck M, Silva R. *Styphlotrema solitaria* Looss, 1899 (Digenea, Styphlotrematidae) infecting *Eretmochelys imbricata* Linnaeus 1758 (Testudines, Cheloniidae) in Brazil. *Neotropical Helminthology*. 2012;6(1):121-6.
191. Cemil AYMAK, Serap Ergene GOZUKARA, Yusuf KATILMIS, Rasit URHAN, UCAR AH, editors. Invertebrate infestation in Green Turtle *Chelonia mydas* and Loggerhead Turtle *Caretta caretta* nests, in Alata Beach, Mersin, Turkey. *Proceedings, Second Mediterranean Conference on Marine Turtles Barcelona Convention – Bern Convention – Bonn Convention*; 2005; Kemer, Antalya, Turkey.
192. Rodenbusch CR, Marks FS, Canal CW, Reck J. Marine leech *Ozobranchus margo* parasitizing loggerhead turtle (*Caretta caretta*) in Rio Grande do Sul, Brazil. *Revista Brasileira de Parasitologia Veterinária*. 2012;21(3):301-3.
193. Vivaldo SG, Sarabia DO, Salazar CP, Hernández ÁG, Lezama JR. Identificación de parásitos y epibiontes de la tortuga Golfina (*Lepidochelys olivacea*) que arribó a playas de Michoacán y Oaxaca, México Identification of parasites and epibionts in the Olive Ridley Turtle (*Lepidochelys olivacea*) that arrived to the beaches. *Vet Méx*. 2006;37:4.

194. McGowan A, Broderick A, Deeming J, Godley B, Hancock E. Dipteran infestation of loggerhead (*Caretta caretta*) and green (*Chelonia mydas*) sea turtle nests in northern Cyprus. *Journal of Natural History*. 2001;35(4):573-81.
195. Donlan EM, Townsend JH, Golden EA. Predation of *Caretta caretta* (Testudines: Cheloniidae) eggs by larvae of *Lanelater sallei* (Coleoptera: Elateridae) on Key Biscayne, Florida. *Caribbean Journal of Science*. 2004;40:415-20.
196. Zárate P, Bjorndal KA, Parra M, Dutton PH, Seminoff JA, Bolten AB. Hatching and emergence success in green turtle *Chelonia mydas* nests in the Galápagos Islands. *Aquatic Biology*. 2013;19(3):217-29.
197. Katılmış Y, Urhan R, Kaska Y, Başkale E. Invertebrate infestation on eggs and hatchlings of the loggerhead turtle, *Caretta caretta*, in Dalaman, Turkey. In: Hawksworth DL, Bull AT, editors. *Marine, Freshwater, and Wetlands Biodiversity Conservation*. Dordrecht: Springer Netherlands; 2006. p. 353-62.
198. walker G, M W, H H, R D, editors. *Parasites of Hawksbill turtles, Eretmochelys imbricata, nesting in north-east Tobago, West Indies*. 38th Annual Symposium on Sea Turtle Biology and Conservation; 2017; Kobe, Japan.
199. Hall SCB, Parmenter CJ. Larvae of two signal fly species (Diptera:Platystomatidae), *Duomyia foliata* McAlpine and *Plagiostenopterina enderleini* Hendel, are scavengers of sea turtle eggs. *Australian Journal of Zoology*. 2006;24(4):245-52.
200. Broderick AC, Hancock EG. Insect infestation of Mediterranean marine turtle eggs. *Herpetological Review*. 1997;28(4):190-1.
201. Lopes HdS. On *Eumacronychia sternalis* Allen (Diptera, Sarcophagidae) with larvae living on eggs and hatchlings of the east Pacific green turtle. *Revista Brasileira de Biologia*. 1982.
202. da Silva PF, Chaves MF, Santos MG, Santos AJB, Magalhães MdS, Andrezza R, et al. Insect Infestation of Hawksbill Sea Turtle Eggs in Rio Grande do Norte, Brazil. *Chelonian Conservation and Biology*. 2016;15(1):147-53.
203. Maros A, Louveaux A, Godfrey MH, Girondot M. *Scapteriscus didactylus* (Orthoptera, Gryllotalpidae), predator of leatherback turtle eggs in French Guiana. *Marine Ecology Progress Series*. 2003;249:289-96.
204. Herbst L, Eckert K, Bjorndal K, Abreu-Grobois F, Donnelly M. *Infectious diseases of marine turtles. Research and management techniques for the conservation of sea turtles IUCN/SSC Marine Turtle Specialist Group*, Washington, DC. 1999.
205. Work TM, Dagenais J, Weatherby TM, Balazs GH, Ackermann M. In Vitro Replication of Chelonid Herpesvirus 5 in Organotypic Skin Cultures from Hawaiian Green Turtles (*Chelonia mydas*). *J Virol*. 2017;91(17).
206. Rebell G, Rywlin A, Haines H. A herpesvirus-type agent associated with skin lesions of green sea turtles in aquaculture. *Am J Vet Res*. 1975;36(08):1221-4.
207. Coberley SS, Herbst LH, Brown DR, Ehrhart LM, Bagley DA, Schaf SA, et al. Detection of antibodies to a disease-associated herpesvirus of the green turtle, *Chelonia mydas*. *Journal of clinical microbiology*. 2001;39(10):3572-7.
208. Stacy BA, Wellehan JFX, Foley AM, Coberley SS, Herbst LH, Manire CA, et al. Two herpesviruses associated with disease in wild Atlantic loggerhead sea turtles (*Caretta caretta*). *Veterinary Microbiology*. 2008;126(1-3):63-73.
209. Herbst LH, Lenz J, Van Doorslaer K, Chen Z, Stacy BA, Wellehan Jr JFX, et al. Genomic characterization of two novel reptilian papillomaviruses, *Chelonia mydas* papillomavirus 1 and *Caretta caretta* papillomavirus 1. *Virology*. 2009;383(1):131-5.
210. Deem SL, Dierenfeld ES, Sounguet GP, Alleman AR, Cray C, Poppenga RH, et al. Blood values in free-ranging nesting leatherback sea turtles (*Dermochelys coriacea*) on the coast of the Republic of Gabon. *Journal of Zoo and Wildlife Medicine*. 2006;37(4):464-71.
211. Mettee N. *Wound Management/V.A.C. The Wider Caribbean Sea Turtle Conservation Network (WIDECAS) Technical Report No. 16*: 2014.

212. Mettee N. Buoyancy Disorders. The Wider Caribbean Sea Turtle Conservation Network (WIDECASST) Technical Report No. 16: 2014.
213. Schmitt T, Leger JS, Munns S, Adams L, editors. Pulmonary function testing in healthy and positively buoyant olive ridley sea turtles (*Lepidochelys olivacea*). IAAAM 36th Annual Conference Proceedings; 2005; Seward, Alaska.
214. Lutz PL, Musick JA. The biology of sea turtles, Volume I: CRC press; 1996.
215. Adimey NM, Hudak CA, Powell JR, Bassos-Hull K, Foley A, Farmer NA, et al. Fishery gear interactions from stranded bottlenose dolphins, Florida manatees and sea turtles in Florida, U.S.A. Marine Pollution Bulletin. 2014;81(1):103-15.
216. Mendonca; V, Abi-Aoun B. The sea turtle *Chelonia mydas* population at Ras Al Hadd Nature Reserve: Turtle nesting density and strands, and turtle predator abundance on Ras Al Jinz beaches – June 2009 Records Ras Al Jinz Scientific and Visitor Centre, 2009.
217. Bezjian M, Wellehan JF, Jr., Walsh MT, Anderson E, Jacobson E. Management of wounds in a loggerhead sea turtle (*Caretta caretta*) caused by traumatic bycatch injury from the spines of a spotted eagle ray (*Aetobatus narinari*). J Zoo Wildl Med. 2014;45(2):428-32.
218. Manire CA, Charles AM, Eric TA, Lynne B, Deborah AF. DEHYDRATION AS AN EFFECTIVE TREATMENT FOR BREVETOXICOSIS IN LOGGERHEAD SEA TURTLES (*CARETTA CARETTA*). Journal of zoo and wildlife medicine. 2013;44(2):447-52.
219. Sloan K. Barnacle growth as an indicator of the onset and duration of the clinical symptoms of debilitated turtle syndrome affecting loggerhead (*Caretta caretta*) sea turtles: College of Charleston; 2011.
220. Fernández I, Retamal MA, Mansilla M, Yáñez F, Campos V, Smith C, et al. Analysis of epibiont data in relation with the Debilitated Turtle Syndrome of sea turtles in *Chelonia mydas* and *Lepidochelys olivacea* from Concepción coast, Chile/Análisis de los datos de epibiontes en relación con el Síndrome de Debilitamiento de Tortugas marinas en *Lepidochelys olivacea* y *Chelonia mydas* de la costa de Concepción, Chile. Latin American Journal of Aquatic Research. 2015;43(5):1024-9.



# 7. Supporting Information

## APPENDICES

### S1 Appendix. Mock Clutch Translocation

1.1. Problem description

1.2. Risk communication

1.3. Hazard identification

1.4. Risk assessment

1.5. Risk management

1.6. Implementation

### S2 Appendix. Handbook for Sea Turtle Disease Risk Analysis (risk assessment workshop)

### S3 Appendix. The handbook for management workshop

### S4 Appendix. Bacteria

4.1. Gram negative bacteria

4.2. Gram positive bacteria

4.3. Not defined by gram staining

4.4. Mixed bacterial infections

### S5 Appendix. Fungi

### S6 Appendix. Parasites

### S7 Appendix. Viruses

### S8 Appendix. Non-infectious diseases of sea turtles

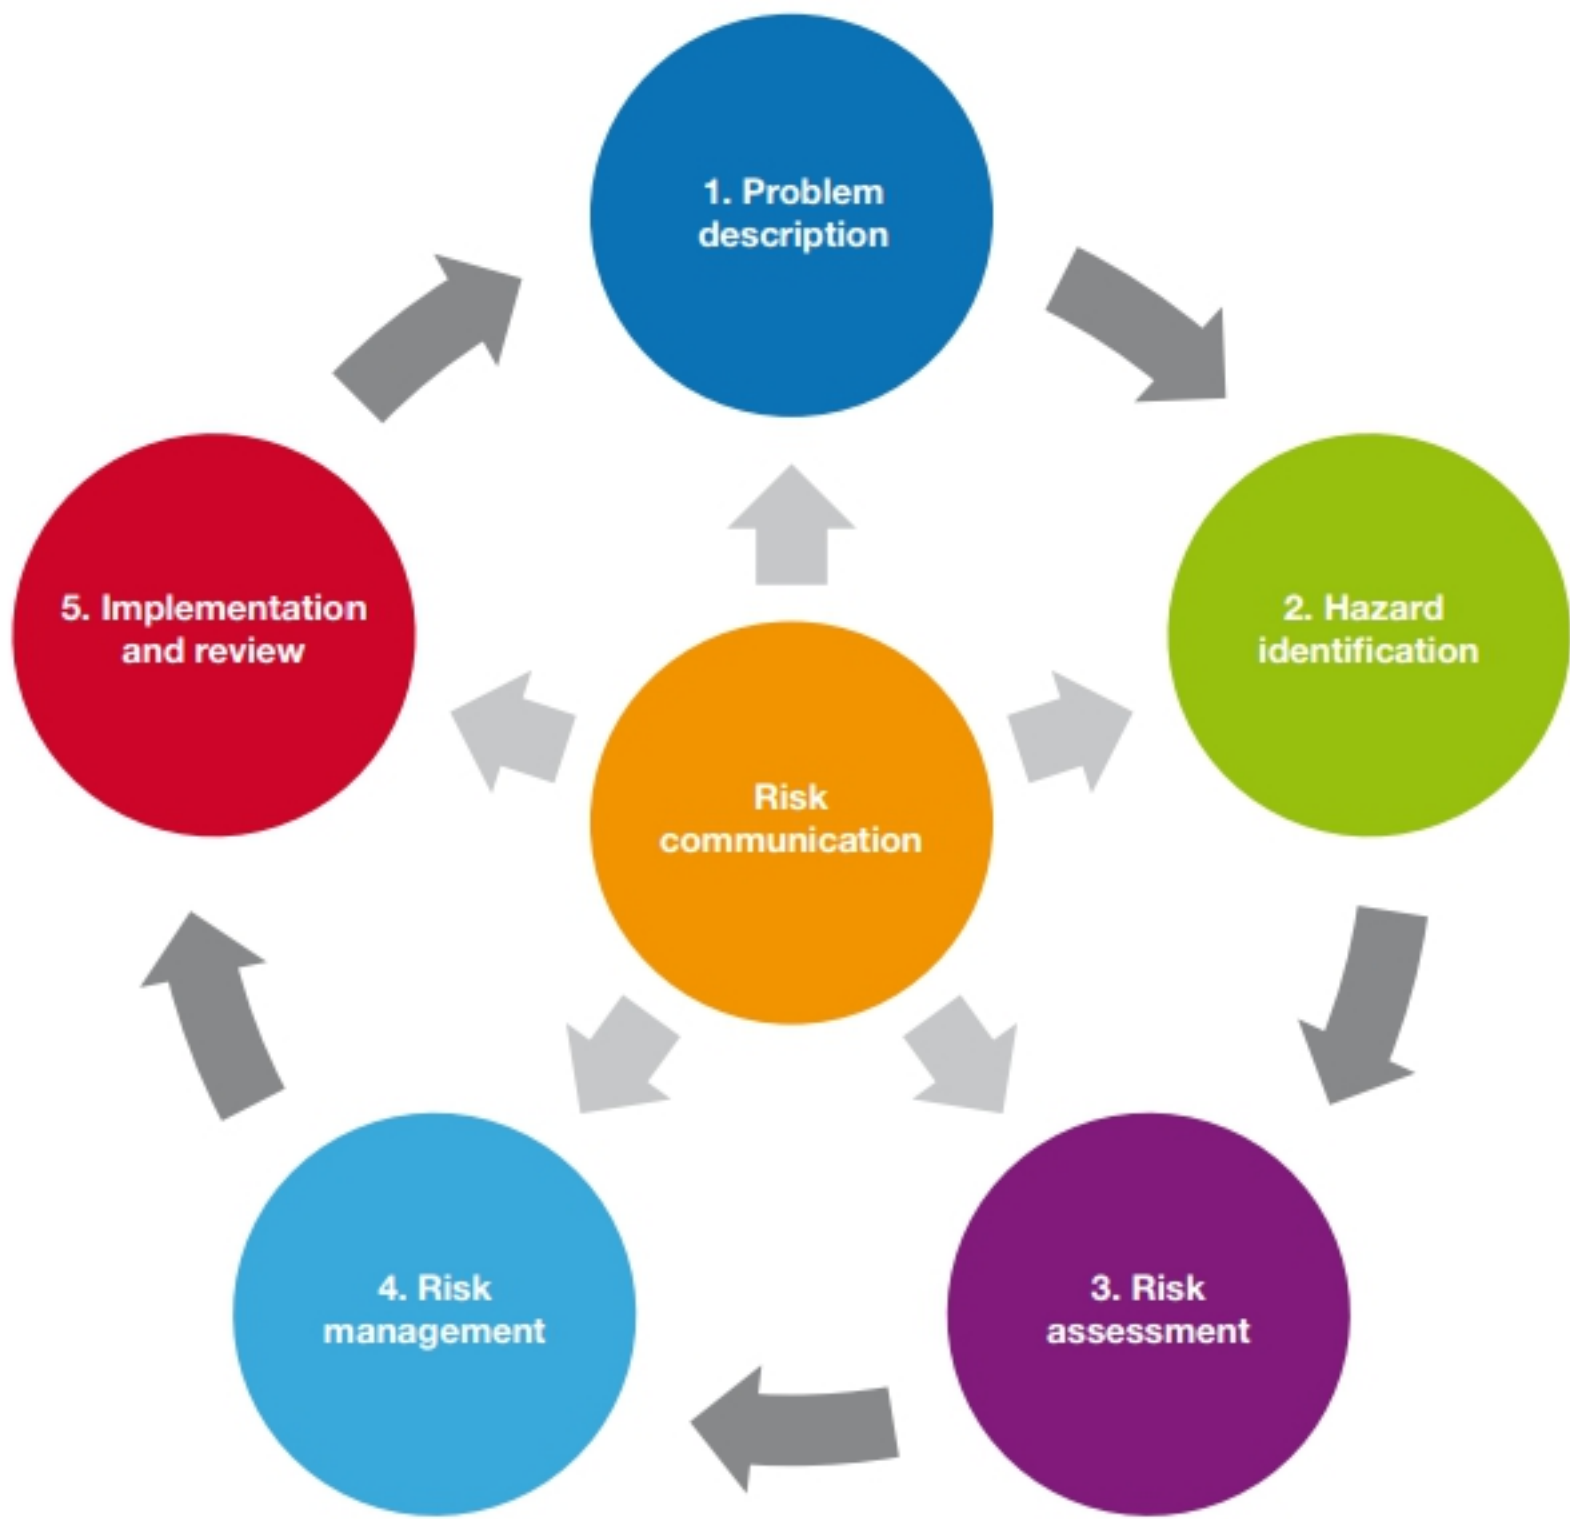

Figure 1

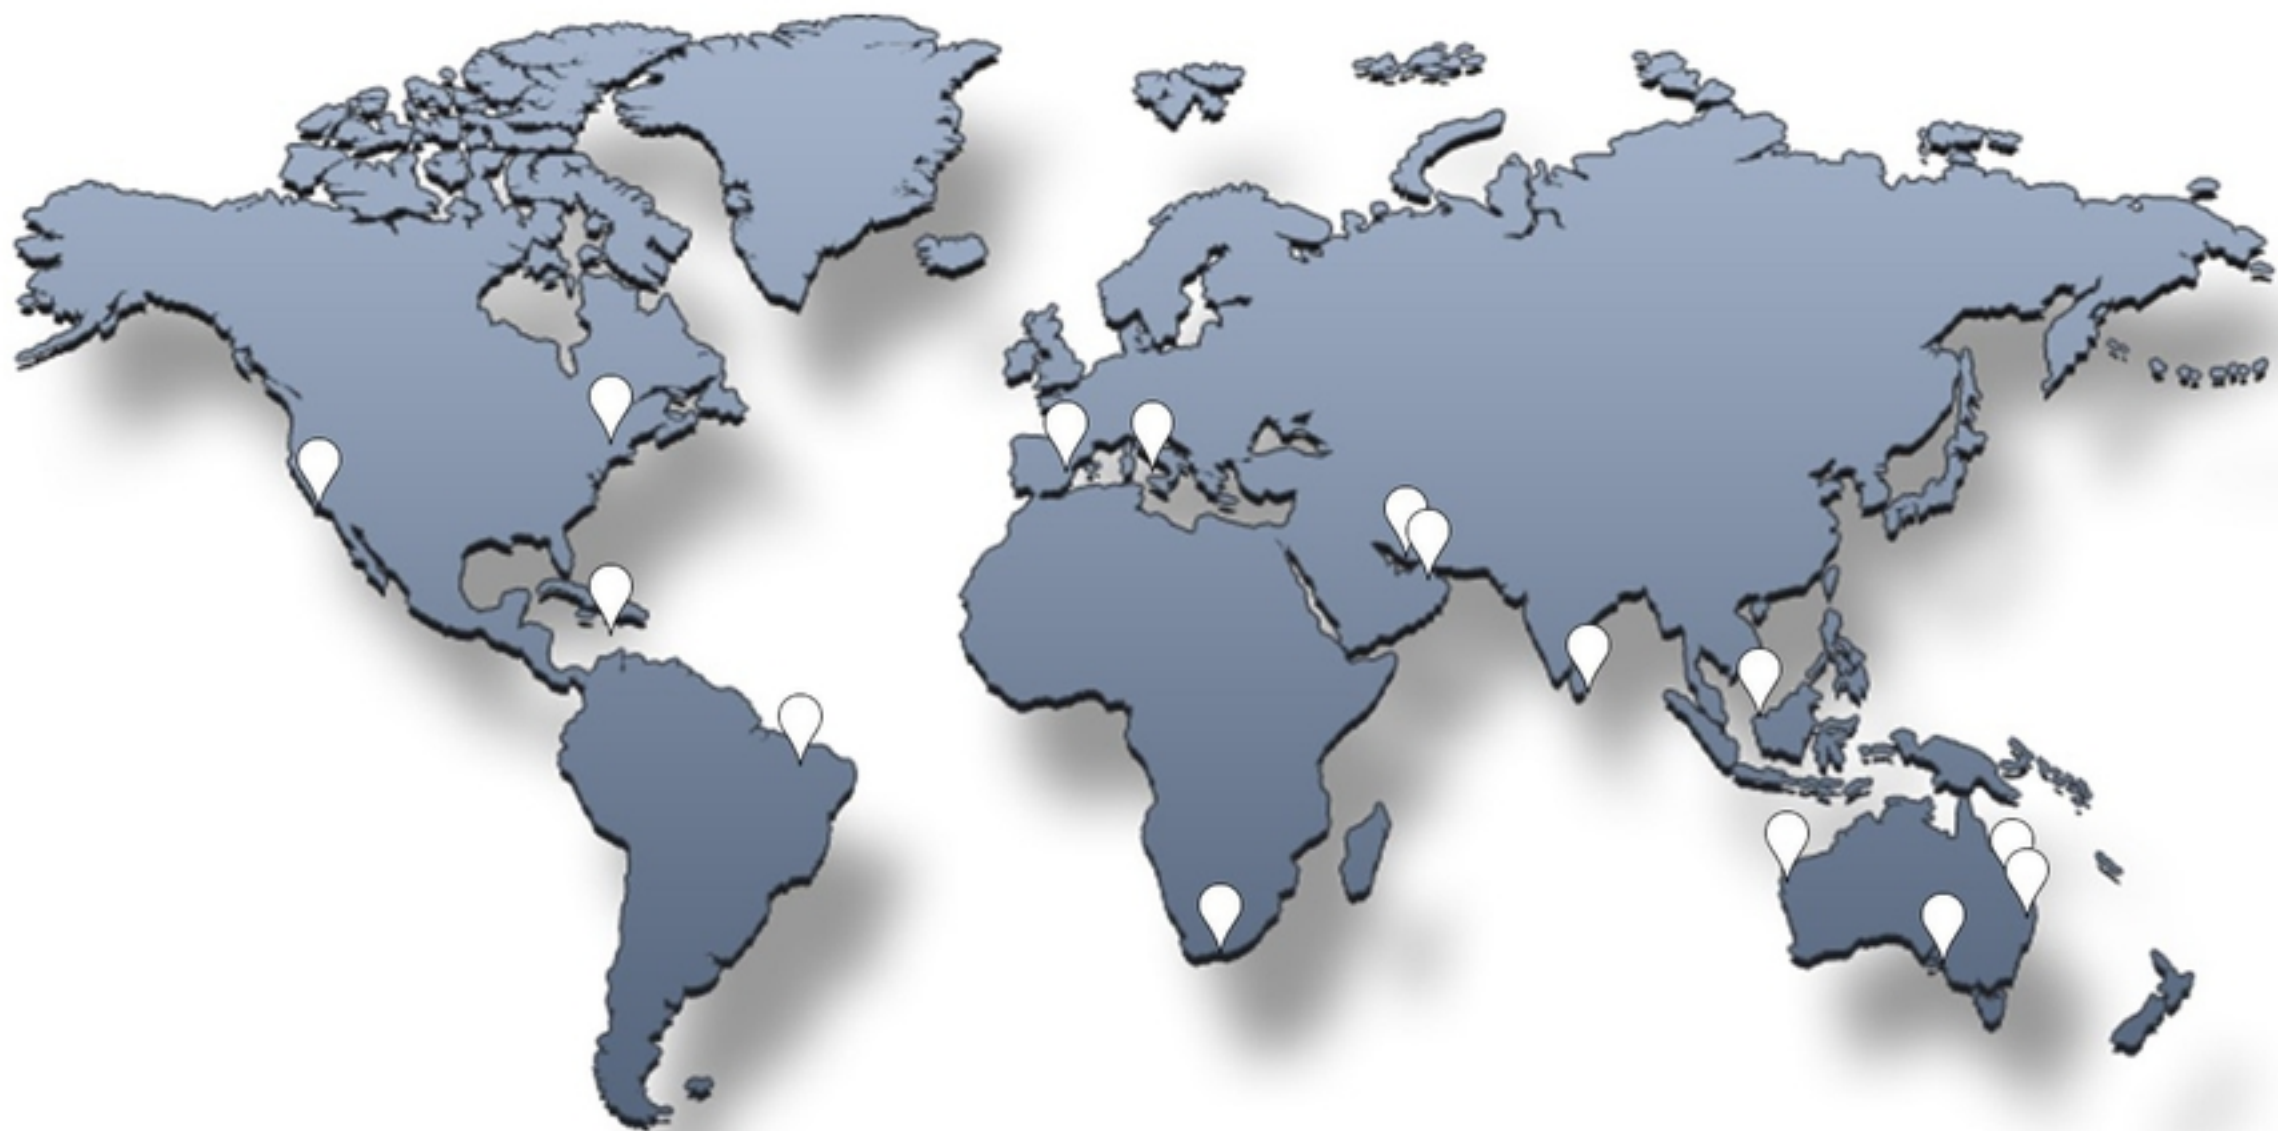

Figure 2

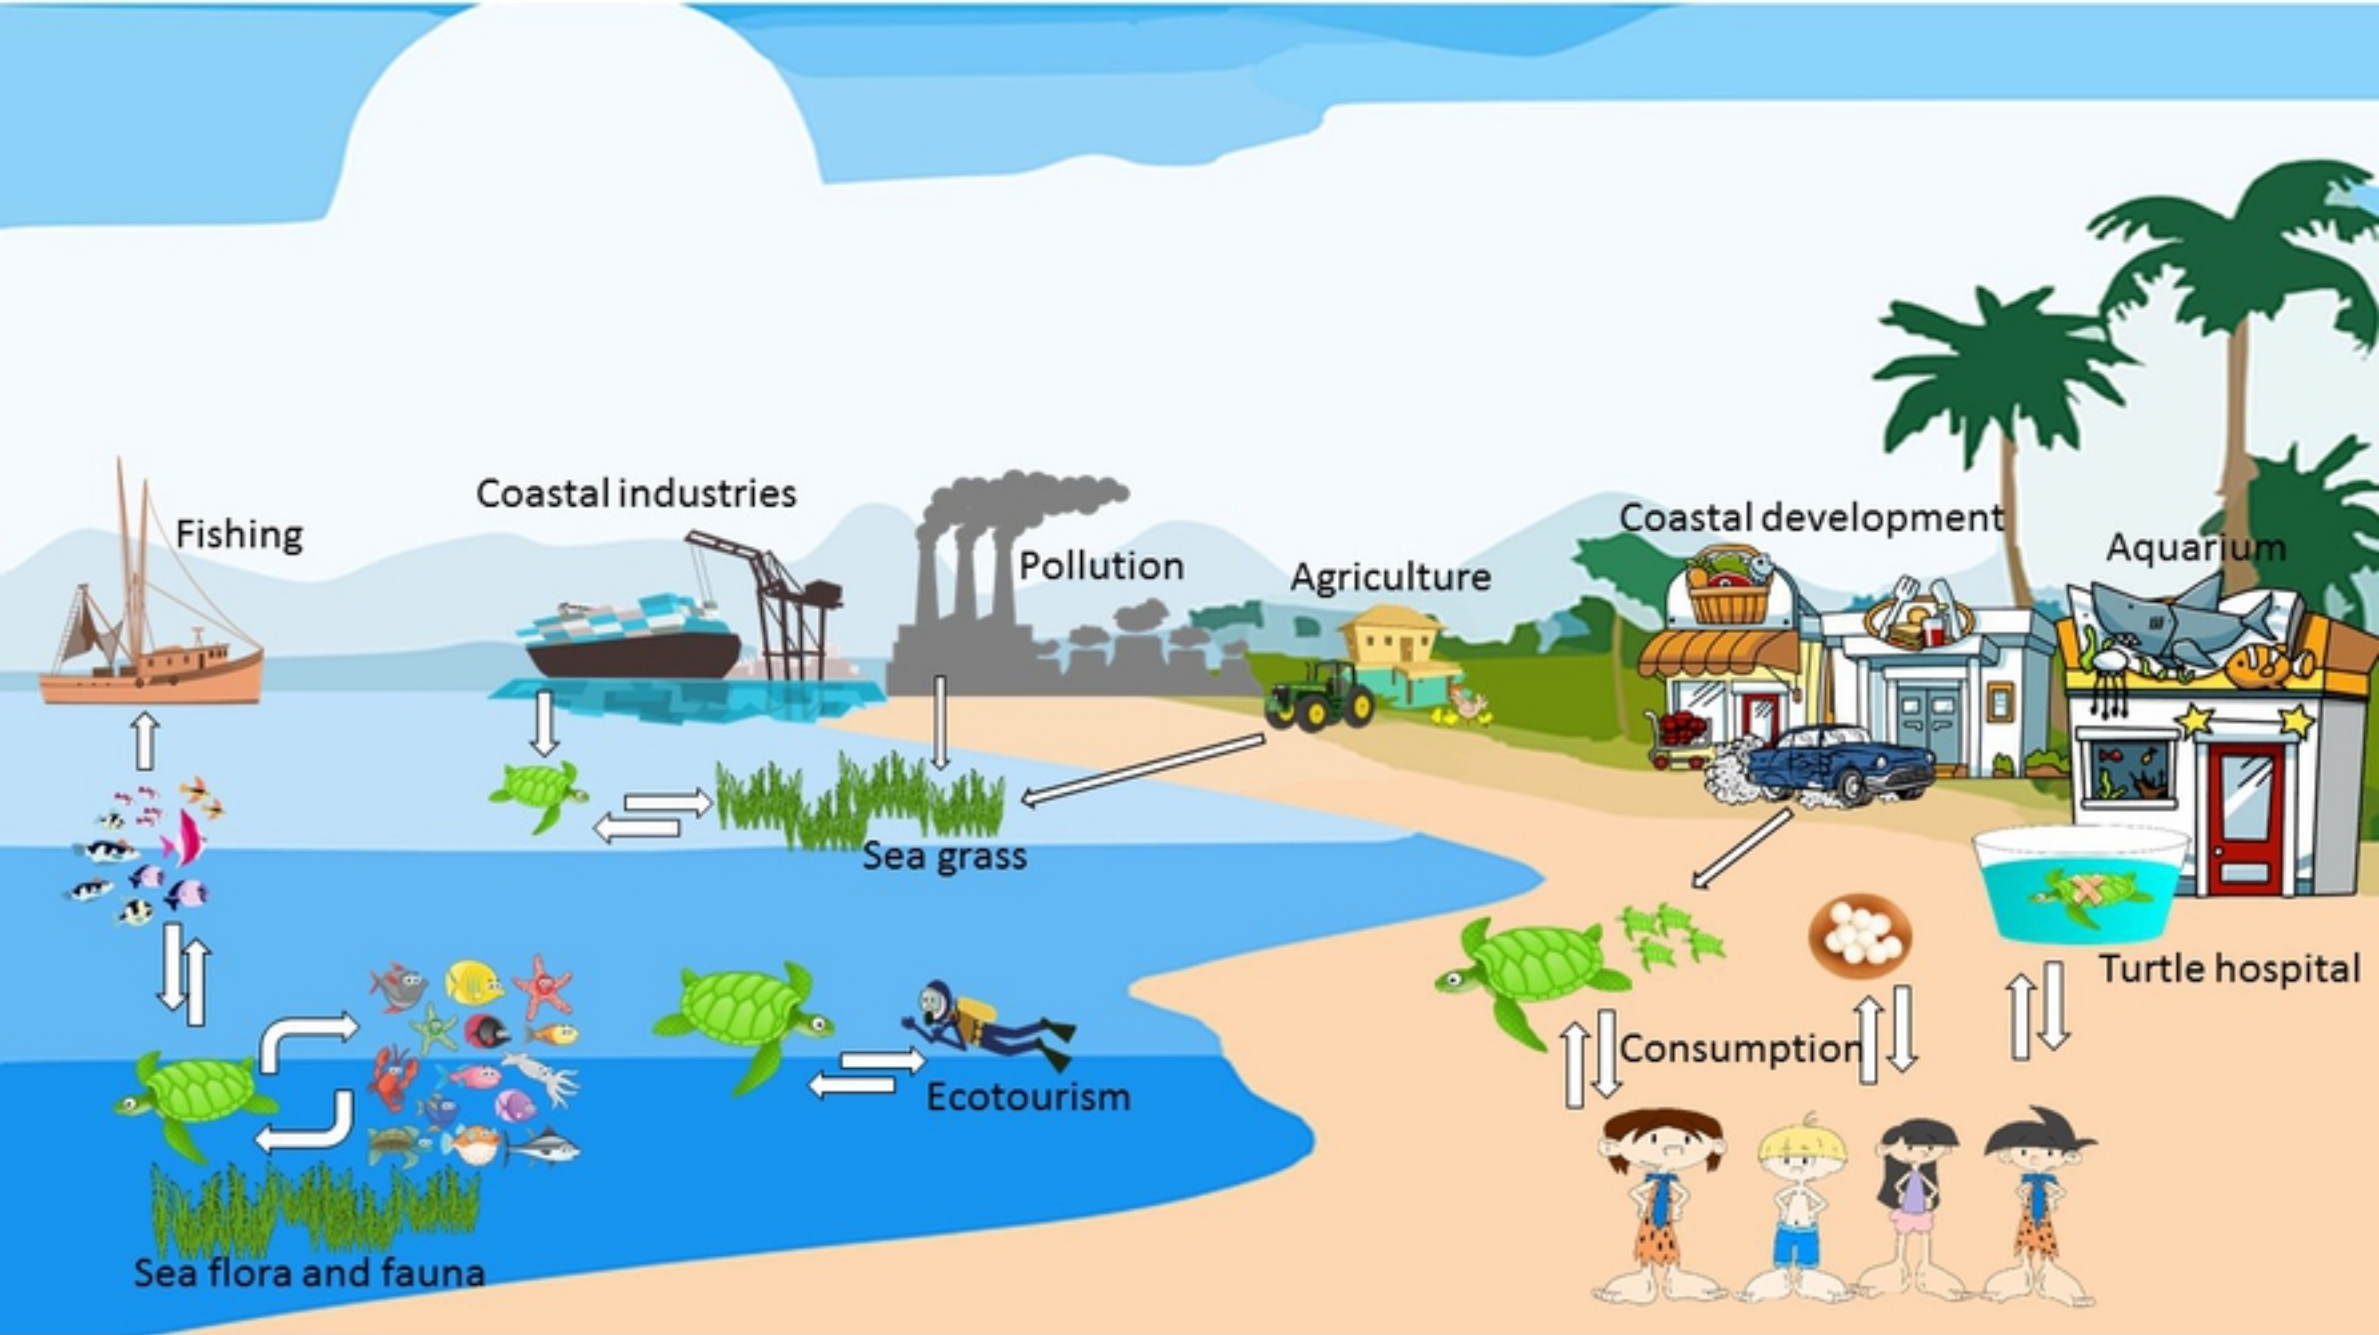

Figure 3

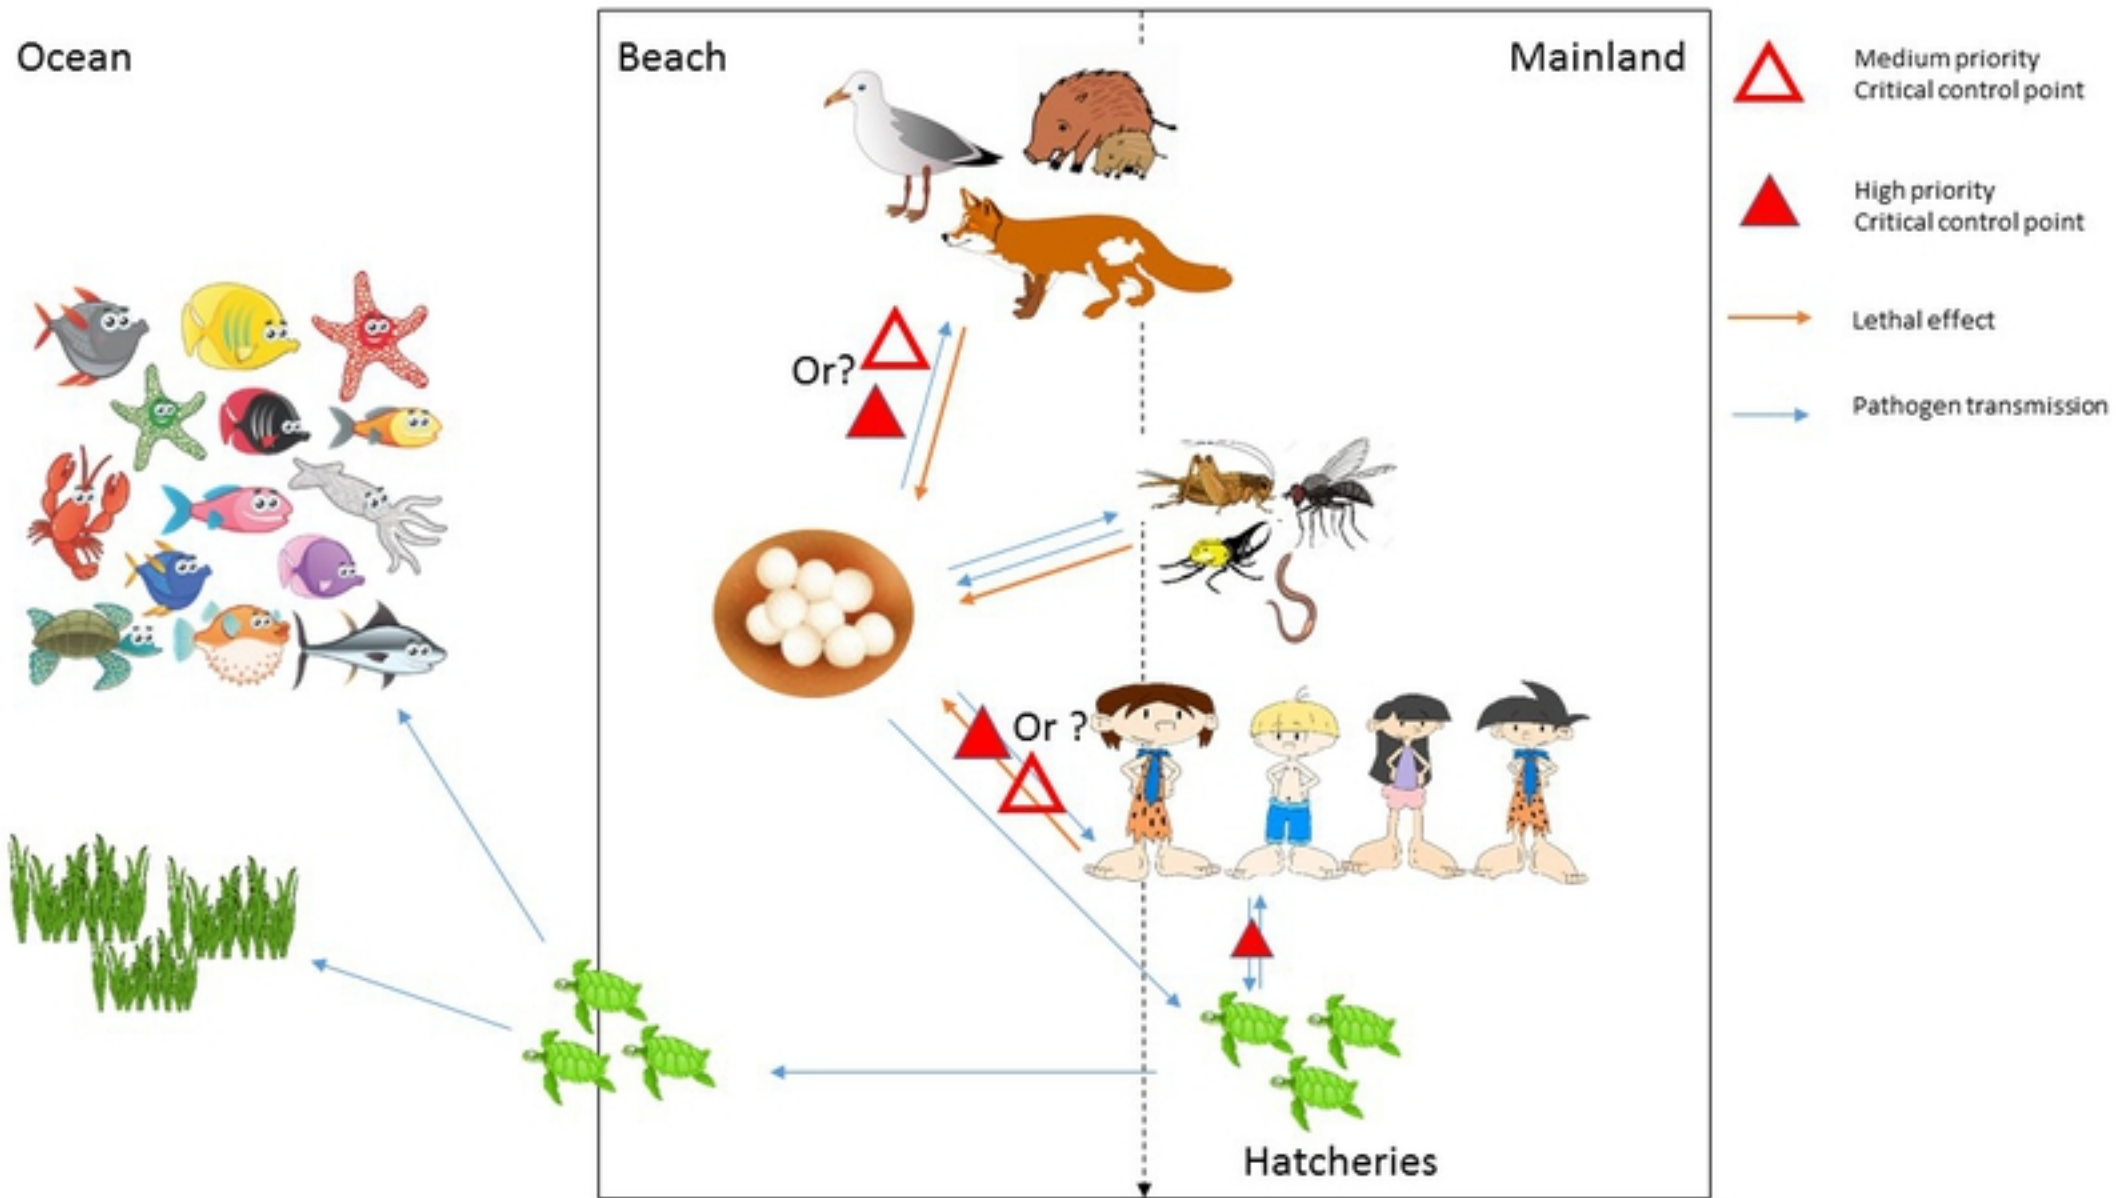

Figure 4
